1 **Peripatric speciation associated with genome expansion and female-biased sex**  
2 **ratios in the moss genus *Ceratodon***

3 **Marta Nieto-Lugilde<sup>1</sup>, Olaf Werner<sup>1</sup>, Stuart F. McDaniel<sup>2</sup>, Petr Koutecký<sup>3</sup>, Jan Kučera<sup>3</sup>, Samah**  
4 **Mohamed Rizk<sup>4</sup> & Rosa M. Ros<sup>1</sup>**

5 1 Departamento de Biología Vegetal, Facultad de Biología, Universidad de Murcia, Campus de Espinardo, 30100 Murcia, Spain.

6 2 Biology Department, University of Florida, Gainesville, Florida 32611, USA.

7 3 Faculty of Science, University of South Bohemia, Branišovská 31, CZ-370 05 České Budějovice, Czech Republic.

8 4 Genetics Department, Faculty of Agriculture, Ain Shams University, 68 Hadayek Shubra, 11241 Cairo, Egypt.

9 **Short title:** Peripatric speciation in the moss genus *Ceratodon*

10 <sup>1</sup>Manuscript received \_\_\_\_\_; revision accepted \_\_\_\_\_.

11 <sup>2</sup>Author for correspondence: Marta Nieto-Lugilde, [manilu@um.es](mailto:manilu@um.es)

12 **ABSTRACT**

13 • **PREMISE OF THE STUDY:** How cosmopolitan, spore dispersed species diverge and new species arise is  
14 unknown. One potentially important mechanism of sympatric speciation in flowering plants is polyploidy, often  
15 in combination with hybridization. The main aim of this study is to provide a broad perspective of the possible  
16 genetic and genome size diversity inside the moss *C. purpureus* s.l in the Mediterranean area, an important  
17 hotspot of biodiversity.

18 • **METHODS:** Mosses of the genus *Ceratodon* from mountainous areas and lowlands of the Mediterranean  
19 region and some western and central European countries were studied. To reconstruct the phylogenetic  
20 relationships five nuclear introns and a chloroplast locus were sequenced. Genome size was estimated using flow  
21 cytometry technology with propidium iodide fluorochrome. Sex was determined by a molecular marker.

22 • **KEY RESULTS:** Two well differentiated clades with high supports were resolved by the sequence analyses,  
23 discriminating two homogeneous groups of specimens: widespread *C. purpureus* and a local group from  
24 southern Spain mountains; those that present a mixed genome are interpreted as recombinants, according to a  
25 coalescent simulation analysis. The two groups also significantly differ in genome size; moreover, a third group,  
26 probably polyploid, has been found. No males were found in samples with the new genotype.

27 • **CONCLUSIONS:** A new local species evolved despite significant spore-mediated long-distance gene flow in  
28 *Ceratodon* and retains its genetic distinctiveness despite some level of hybridization with sympatric widespread  
29 *C. purpureus*. The reproductive isolation may be associated with the decrease of males.

30 **Key words:** Bryophyta, cosmopolitan species, DNA sequencing, flow cytometry, hybridization, Mediterranean  
31 mountains, phylogenetic data, polyploidy.

32

### 33 **INTRODUCTION**

34 The origin of new species represents a major unsolved problem in evolutionary biology (Rieseberg and  
35 Willis, 2007; Seehausen et al., 2014; Dev, 2015). Theory shows that the simplest mechanism for generating new  
36 species is through allopatric speciation, in which some portion of a species range becomes geographically  
37 isolated, allowing natural selection or genetic drift to drive allele frequency changes that ultimately generate  
38 additional reproductive barriers (Mayr, 1963; Barraclough and Vogler, 2000; Coyne and Orr, 2004). This is  
39 because even modest levels of gene flow can homogenize allele frequencies between populations, retarding  
40 divergence (Wright, 1931). While local adaptation can drive peripatric or sympatric divergence in cases where  
41 the immigrant rate is less than the intensity of selection (Lenormand, 2002), most empirical studies cannot  
42 exclude the possibility that speciation was preceded by a period of allopatry (Nadachowska-Brzyska et al., 2013;  
43 Shaner et al., 2015). This presents a paradox in species-rich groups like mosses, where long-distance migration  
44 appears to be common: speciation and diversification have occurred in spite of the fact that geographic barriers  
45 may not cause a long-term impediment to gene flow (Shaw et al., 2003; Piñeiro et al., 2012; Lewis et al., 2014a;  
46 Szövényi et al., 2014; Barbé et al., 2016).

47 One potential resolution to this paradox is sympatric speciation through polyploidy, which is frequent in  
48 flowering plants (Ramsey and Schemske, 1998; Mallet, 2005), and potentially in mosses (McDaniel et al., 2010;  
49 Rensing et al., 2013). Polyploidy generates a strong reproductive barrier in a single mutational event (Ramsey  
50 and Schemske, 1998; Madlung, 2013). Nevertheless, the homogeneity in bryophyte genome sizes (Voglmayr,  
51 2000) raises the possibility that the role played by polyploidy in moss speciation may be small relative to other  
52 speciation mechanisms. The nature of the genomic, demographic, or ecological factors beyond geographic

53 isolation and polyploidy that generate reproductive barriers between nascent species of mosses remain poorly  
54 characterized (McDaniel et al., 2010; Yousefi et al., 2017).

55         Within mosses, the genetic basis of reproductive barriers is best characterized among populations of  
56 *Ceratodon purpureus* (Hedw.) Brid. (Ditrichaceae) (McDaniel et al., 2007, 2008). Moreover, the developing  
57 genomic and laboratory tools make this species a promising model for further ecological genomic study  
58 (McDaniel et al., 2016). *C. purpureus* is abundant on every continent, and grows on wide variety of substrates  
59 (Crum, 1973). Molecular population genetic analyses indicated that gene flow among northern and even  
60 southern hemisphere populations was frequent but tropical populations were more genetically isolated  
61 (McDaniel and Shaw, 2005). These observations suggest that the current level of sampling may be insufficient to  
62 detect the full scope of population structure among populations in this taxon. Indeed, partial hybrid breakdown  
63 was clearly evident in crosses between a temperate and a tropical population, suggesting that reproductive  
64 barriers may be in the process of evolving between ecologically distinct regions of the distribution of *C.*  
65 *purpureus* (McDaniel et al., 2007, 2008). These barriers did not involve ploidy differences. However, the  
66 genome size of *C. purpureus* is well-characterized in only a modest number of European samples (0.39 pg s.d.  
67 0.0046, n=10, Voglmayr, 2000), leaving open the possibility that polyploidy contributes to reproductive isolation  
68 among isolates from other parts of its broad cosmopolitan distribution.

69         In a previous phylogeographic analysis (McDaniel and Shaw, 2005), the Mediterranean region contained  
70 several rare haplotypes that were distantly related to the common haplotypes found throughout the range of *C.*  
71 *purpureus*. Here we sought to test for the existence of any relationship between the genetic diversity and DNA  
72 content found in the Mediterranean area in the moss genus *Ceratodon*. McDaniel and Shaw (2005) argued that  
73 frequent gene flow maintained the genetic homogeneity of the species, at least among the temperate Northern  
74 Hemisphere populations, but that the divergent populations were simply outside the main area of spore rain, and  
75 therefore had not yet been homogenized. Alternatively, these isolated populations could represent cryptic  
76 species, and reproductive isolation evolved in spite of this gene flow (McDaniel et al., 2007, 2008). To  
77 distinguish between these alternatives, we evaluated the patterns of polymorphism in five nuclear introns and a  
78 single chloroplast locus in plants sampled from mountainous areas of the Mediterranean region and other

79 mountain regions and lowlands mostly from southern Europe. We also estimated the genome size of these  
80 isolates using flow cytometry. These data clearly show that-species have evolved within the genus *Ceratodon*,  
81 accompanied by both large non-polyploid and allopolyploid changes in genome size, and potentially major  
82 changes in sexual system. These insights also highlight the complexity of peripatric speciation mechanisms in  
83 bryophytes.

84

## 85 MATERIALS AND METHODS

86 **Plant material**— For this study we generated genetic data for a total of 93 samples, 71 (76.4%) from  
87 Mediterranean mountain areas (47 from Spanish Sierra Nevada Mountains, 19 from Spanish central mountain  
88 ranges, three from Spanish south-eastern mountains, and two from Sicilian Mount Etna). Of the remaining 22  
89 samples, 11 (11.8%) were from other European mountainous systems (eight from the Alps and three from the  
90 Pyrenees) and 11 specimens (11.8%) were from lowlands (three from Czech Republic, two from Germany, two  
91 from Sweden, two from United Kingdom, and two from South Africa). We collected 84 new samples for this  
92 study, all of which are deposited at MUB herbarium, and nine samples were loaned from herbaria, including  
93 BOL (Bolus Herbarium, University of Cape Town, South Africa), CBFS (University of South Bohemia, Czech  
94 Republic), S (Herbarium of the Swedish Museum of Natural History, Sweden), and two samples were donated  
95 from Laura Forrest (at Royal Botanic Garden Edinburgh, United Kingdom). We sequenced four specimens of  
96 *Cheilothela chloropus* (Brid.) Lindb. as outgroup (Voucher information and Genbank accession numbers are  
97 listed in Appendix 1).

98 **DNA sequencing**— To examine the genealogical relationships among the 93 isolates, we sequenced five nuclear  
99 exon-primed intron-spanning loci, including *rpL23A* and *TRc1b3.05* (McDaniel et al., 2013a) referenced by EST  
100 (accessions AW086590 and AW098560), *hp23.9*, *PPR* and *TBP* (McDaniel et al., 2013a, b), and a single  
101 chloroplast locus (*trnL*). We amplified all loci from all individuals in 20  $\mu$ L polymerase chain reaction using  
102 Thermo Scientific DreamTaq DNA Polymerase (Thermo Fisher Scientific Inc.). The cycling conditions were  
103 94°C for 2 min, then 10 cycles of 94°C for 15 s, an annealing temperature of 65°C that dropped one degree each  
104 cycle, and 72°C for 1 min, followed by 20 cycles of 94°C for 15 s, 56°C for 30 s, and 72°C for 1 min, and

105 terminating with 72°C for 7 min (McDaniel et al., 2013b). The resulting PCR products were ready to use for  
106 sequencing removing unincorporated primers and inactivates unincorporated nucleotides using Exo-AP Clean-up  
107 reaction. Sequencing was accomplished on an ABI3730XL DNA Analyzer, Applied Biosystems (Macrogen  
108 Europe, The Netherlands, Amsterdam).

109 ***Cloning of DNA sequences***— In samples where we observed double peaks in the chromatograms, we cloned all  
110 loci. PCR products were isolated from agarose gels, and cloned using the CloneJet PCR Cloning Kit  
111 (ThermoFisher Scientific, Spain). Cloning efficiency and accuracy were checked using PCR reactions,  
112 successful clones then were sequenced using an ABI3730XL DNA Analyzer (Macrogen).

113 ***Phylogenetic analyses***— We aligned the DNA sequences using CLUSTALW (Larkin et al., 2007) as  
114 implemented in Bioedit (Hall, 1999) and manually resolved inconsistencies in the resulting alignment. DnaSP v5  
115 (Librado and Rozas, 2009) was used to observe characteristics such as total length with and without gaps,  
116 number of constant positions and number of parsimony-informative variable positions about all loci. We coded  
117 gaps as informative with a simple indel coding strategy (Simmons and Ochoterena, 2000) implemented in  
118 SeqState (Müller, 2005). We performed phylogenetic analyses using MrBayes v.3.2 (Ronquist et al., 2012). The  
119 need for a priori model testing was removed using the substitution model space in the Bayesian MCMC analysis  
120 itself (Huelsenbeck et al., 2004) with the option nst=mixed. The sequence and indel data were treated as separate  
121 and unlinked partitions. The a priori probabilities supplied were those specified in the default settings of the  
122 program. Posterior probability distributions of trees were created using the Metropolis-coupled Markov chain  
123 Monte Carlo (MCMCMC) method. Two runs with four chains with  $1 \times 10^7$  generations were run simultaneously  
124 for loci *hp23.9*, *TBP* and *trnL*, with the temperature of the single heated chain set was the default in MrBayes.  
125 Eight chains ( $1 \times 10^6$  generations each) were run, with the temperature of the single heated chain set to 2 (*PPR*),  
126 3 (*TRc1b3.05*) and 6 (*rpL23A*). Chains were sampled every 1000 generations and the respective trees were  
127 written into a tree file. The first 25% of the total sampled trees of each run were discarded as burnin. Consensus  
128 trees and posterior probabilities of clades were calculated by combining the two runs and using the trees sampled  
129 after the chains converged and had become stationary. The sump command of MrBayes was used to check  
130 whether an appropriate sample from the posterior was obtained. To do so, we first inspected visually the log

131 likelihood plot, which should not show tendencies to decrease or increase over time and the different runs should  
132 show similar values. Then we checked that the effective sampling size (ESS) values for all parameters reached at  
133 least 500 and finally that the Potential Scale Reduction Factor (PSRF) for each parameter was close to 1.00. The  
134 genealogies were rooted with sequences from *Cheilothela chloropus*. The final trees were edited with  
135 TreeGraph2 (Stöver and Müller, 2010). We performed phylogenetic analyses combining the new sequences  
136 generated here with other sequences for the *TBP* locus available on GenBank from Antarctica (1), Australia (1),  
137 and Eastern North America (54), which were previously reported by McDaniel et al. (2013b).

138         Low resolution in phylogenetic reconstructions can sometimes be caused by incongruence or conflicts in  
139 the molecular datasets that lead to different equally possible solutions (Huson and Bryant, 2006; Draper et al.,  
140 2015). To evaluate this possibility, we reconstructed a phylogenetic network based on the neighbor-net method  
141 (Bryant and Moulton, 2004) using the program SplitsTree4, version 4.13.1 (Huson and Bryant, 2006) for the six  
142 loci together. The calculations were based on uncorrected p-distances. This estimates the mean refined  
143 incompatibility score from nearby sites. The significance is then tested using a permutation test. Under the null  
144 hypothesis of no recombination, the genealogical correlation of adjacent sites is invariant to permutations of the  
145 sites as all sites have the same history. In the case of finite levels of recombination, the order of the sites is  
146 important, as distant sites will tend to have less genealogical correlation than adjacent sites (Bruen et al., 2006).  
147 To test the hypothesis of recombination in each graph, a pairwise homoplasy index (Phi-test) was calculated,  
148 which is a robust and reliable statistic to detect recombination. In accordance with Bruen et al. (2006) for the Phi  
149 test of recombination, p-value < 0.05 indicates the presence of recombination signal. DnaSP v5 (Librado and  
150 Rozas, 2009) was used to observe characteristics such as total length with and without gaps, number of constant  
151 positions and number of parsimony-informative variable positions about all loci.

152 **Coalescent stochasticity analyses**— Individual gene trees often differ from each other and from the species tree  
153 (Rosenberg, 2002; Mao et al., 2014). In order to assess whether incomplete lineage sorting alone could explain  
154 the incongruent topologies of the trees based on different markers, we compared the tree distance of simulated  
155 trees with the distance of original gene trees. To do so, we first calculated the effective population size  $N_e$  using a  
156 mutation rate per generation ( $\mu$ ) in the nuclear regions of  $1 \times 10^{-8}$  (McDaniel et al., 2013b). The allelic diversity

157 ( $\theta_w$ ) for the two well differentiated clades was calculated using DNAsp 5.10 (Librado and Rozas, 2009).  $N_e$  can  
158 then be calculated using the formula  $\theta_w = 2\mu N_e$ . Gene trees and species trees in the form of chronograms for the  
159 nuclear and *trnL* regions were obtained using BEAST v1.8.0 (Drummond et al., 2012). The clock was set to  
160 lognormal relaxed clock, the species tree prior to Yule process. The substitution model was set to HKY, gamma  
161 + invariant sites. The MCMC chain was set to 10 000 000 generations and parameters were logged every 1000  
162 generations. The resulting gene trees and species trees were then used to simulate under the coalescent 100 new  
163 “gene trees” using the tool “coalescent contained within the current tree” in Mesquite 3.31 (Maddison and  
164 Maddison, 2017). The effective population size for the simulations was set to 500,000 based on the maximum of  
165 the estimations obtained for individual genetic regions. The tree-to-tree distances (symmetric distance) for each  
166 observed gene tree and the corresponding simulated trees (baseline distribution) were calculated with Treedist in  
167 Phylip 3.69 (Felsenstein, 2005). These distributions were compared with the distance between the two observed  
168 gene trees for each pair of markers. If the distance between the two observed gene trees is larger than the tree-to-  
169 tree distance of the gene trees and the corresponding simulated trees, incomplete lineage sorting alone is an  
170 unlikely explanation for the incongruence observed among the real gene trees (Maureira-Butler et al. 2008).

171 **Genome size determination**— We used flow cytometry (FCM) technology for 75 specimens to estimate nuclear  
172 DNA content. One shoot of each sample was chopped with a razor blade together with the internal standard  
173 *Carex acutiformis* Ehrh. (1C = 0.41 pg, Lipnerová et al., 2012) or *Bellis perennis* L. (1C = 1.56 pg; our own  
174 calibration against *Carex acutiformis*) in 1 ml of LB01 buffer (Doležel et al. 1989). The fluorochrome propidium  
175 iodide and RNase IIa (both at final concentration 50 µg/ml) were added immediately; the samples were stained  
176 for at least 10 minutes. The samples were analyzed using a Partec CyFlow SL flow cytometer equipped with a  
177 532 nm (green) diode-pumped solid-state laser (100 mW output); the fluorescence intensity of 12000 particles  
178 was recorded. We used preferably in vitro cultivated fresh material, but for 47 samples that did not grow  
179 satisfactorily in vitro, we used dry material collected in the years 2009-2014. The fluorescence histograms were  
180 processed using FlowJo v 10.2 software (TreeStar Inc.).

181 **Sex determination**— To determinate sex, one plant per sample was employed. We amplified the *rpS15A* sex-  
182 linked locus by PCR and digested the product with HindIII. An intron in the *rpS15A* amplicon contains a cut-site

183 difference between the male and female products (Norrell et al., 2014) which is clearly observable in the banding  
184 patterns which were visualized after electrophoresis in an agarose gel and scored by hand. We identified the sex  
185 of 82 samples, 88.17 % of the total, which were from Sierra Nevada Mountains (42), Spanish central mountain  
186 ranges (16), Spanish south-eastern mountains (3), Sicilian Mount Etna (2), Alps (7), Pyrenees (3), South Africa  
187 (2), Germany (2), Czech Republic (3), and Sweden (2). For the remaining samples we could not unambiguously  
188 interpret the pattern in the restriction-site fragment length polymorphism in the *rpS15A* amplicon. We express  
189 the results as a proportion of males and computed the 95% confidence interval for this estimate with the *dbinom*  
190 function in R (R Development Core Team, 2017).

191

## 192 **RESULTS**

193 **Phylogenetic analyses**— The sequence alignments varied in total length between 207 (215 with coded gaps) to  
194 848 (891) positions, for *hp23.9* and *rpL23A* respectively. The number of constant positions was between 186 and  
195 715 for the above mentioned loci and the parsimony-informative variable positions differed between 5 and 95 for  
196 *trnL* and *rpL23A* respectively (Table 1). The loci *TRc1b3.05*, *rpL23A*, *TBP*, and *PPR* showed two well  
197 differentiated clades with support of 1-1 posterior probability (pp), 1-1pp, 0.956-1pp, 0.866-0.769pp,  
198 respectively (Fig. 1, see Supplemental Data with this article, Appendices S1, S2, S3). In the case of *rpL23A*,  
199 sequences of *Cheilothea chloropus* were not obtained for use as outgroup, but again two clades were resolved.  
200 The *hp23.9* locus had a support for one clade of 1 pp but the other clade had a value of 0.553 pp (Appendix S4).  
201 In all the five nuclear loci studied, one of the clades was formed always by 34 Sierra Nevada Mountains samples  
202 and one of the Spanish south-eastern mountains; we refer to this as the SN group. The second clade consistently  
203 included 42 specimens coming from the rest of the sampled areas, including one from Sierra Nevada and two  
204 from Spanish south-eastern mountains; we refer to this as the Worldwide (Ww) group. For one marker (*TBP*) we  
205 added sequences available at GenBank, including samples from Antarctica, Australia, and North America. The  
206 resulting tree topology shows that our samples give a reasonable good representation of the Ww group and that  
207 none of these additional sequences is closely related to the SN samples (Appendix S5). The remaining 17  
208 sequenced samples were strongly resolved in either the SN clade or the Ww clade, depending on the studied



209 locus (they did not present intermediate sequences between both clades, Appendix S6); we considered these  
210 samples recombinants. The term “hybrid” applied to bryophytes should strictly be used only for the sporophytic  
211 hybrids (2n) (Anderson, 1980); for their gametophytic progeny (n) showing combination of parental alleles after  
212 meiosis “recombinants” should be used (Shaw, 1994, 1998) in order not to confuse with hybrids observed among  
213 vascular plants. The recombinants derived mainly from SN Mountains, but also from Spanish central mountain  
214 ranges, the Alps and the lowlands of the United Kingdom (Fig. 2). The chloroplast locus showed one well  
215 supported clade (0.965 pp) and all remaining samples with deeper coalescence ties (Fig. 1). All the samples  
216 considered as recombinants based on the nuclear markers were closely related and sister to the rest of the SN  
217 samples, with the only exception of one specimen from Sierra Nevada Mountains (MUB 49528), which is a  
218 recombinant and belongs to the Ww chloroplast clade.

219

220 **Table 1.** Characteristics of the loci used for molecular evolutionary analyses. The genomic location “nuclear -  
221 putative autosomal” is based on unpublished data.

| Locus            | Genomic location             | Sequence length<br>(with gaps) | Invariant sites | Parsimony-<br>informative<br>sites |
|------------------|------------------------------|--------------------------------|-----------------|------------------------------------|
| <i>hp23.9</i>    | Nuclear – autosomal          | 207 (215)                      | 186             | 15                                 |
| <i>PPR</i>       | Nuclear – U/V                | 331 (334)                      | 309             | 8                                  |
| <i>rpL23A</i>    | Nuclear – putative autosomal | 848 (891)                      | 715             | 95                                 |
| <i>TBP</i>       | Nuclear – autosomal          | 365 (365)                      | 337             | 11                                 |
| <i>TRc1b3.05</i> | Nuclear – putative autosomal | 402 (417)                      | 362             | 28                                 |
| <i>trnL</i>      | Chloroplast                  | 320 (320)                      | 311             | 5                                  |

222

223 The apparent uncertain position of some individuals is clarified by the result of the Neighbor-Net network (Fig.  
224 3). Moreover for the phi-test when the six loci were studied together, a highly significant value (0.0) was  
225 obtained, confirming the presence of recombination signal. Graphically two extreme groups can be observed, the  
226 SN group and the Ww group, with some individuals in intermediate positions, forming a net.

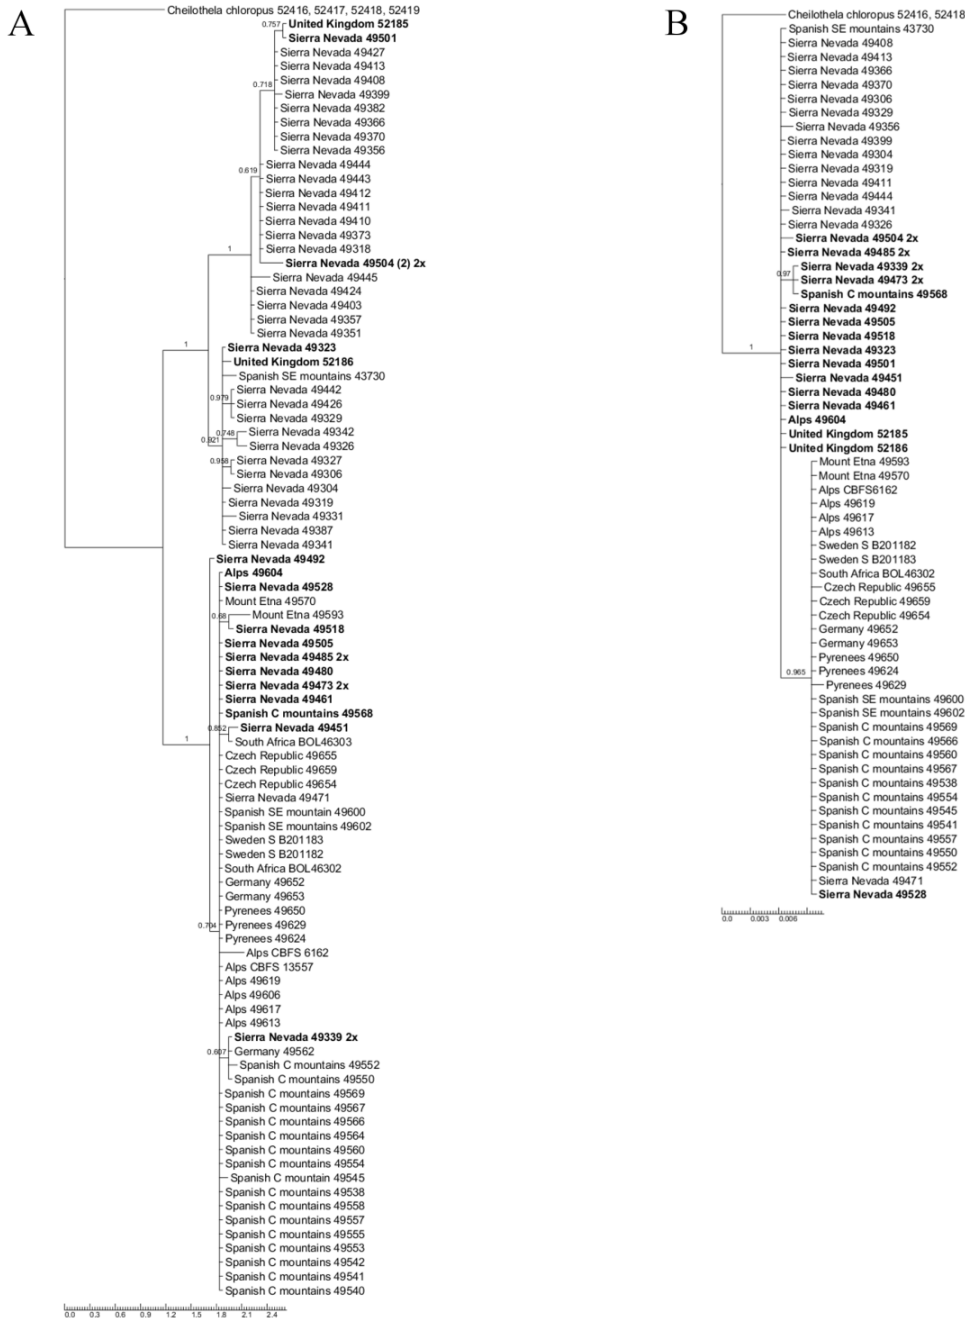

227

228 **Fig. 1.** Phylogenetic trees inferred from two of the studied loci. For each tip in the trees geographical origin and  
 229 number of herbarium are given (numbers without letters are from MUB); 2x is used to highlight diploid samples;  
 230 number of equal sequences obtained by cloning is indicated between parentheses if there was more than one;  
 231 bold letters indicate recombinant samples. A) From nuclear *TRc1b3.05* locus and B) From chloroplast *trnL*  
 232 locus.

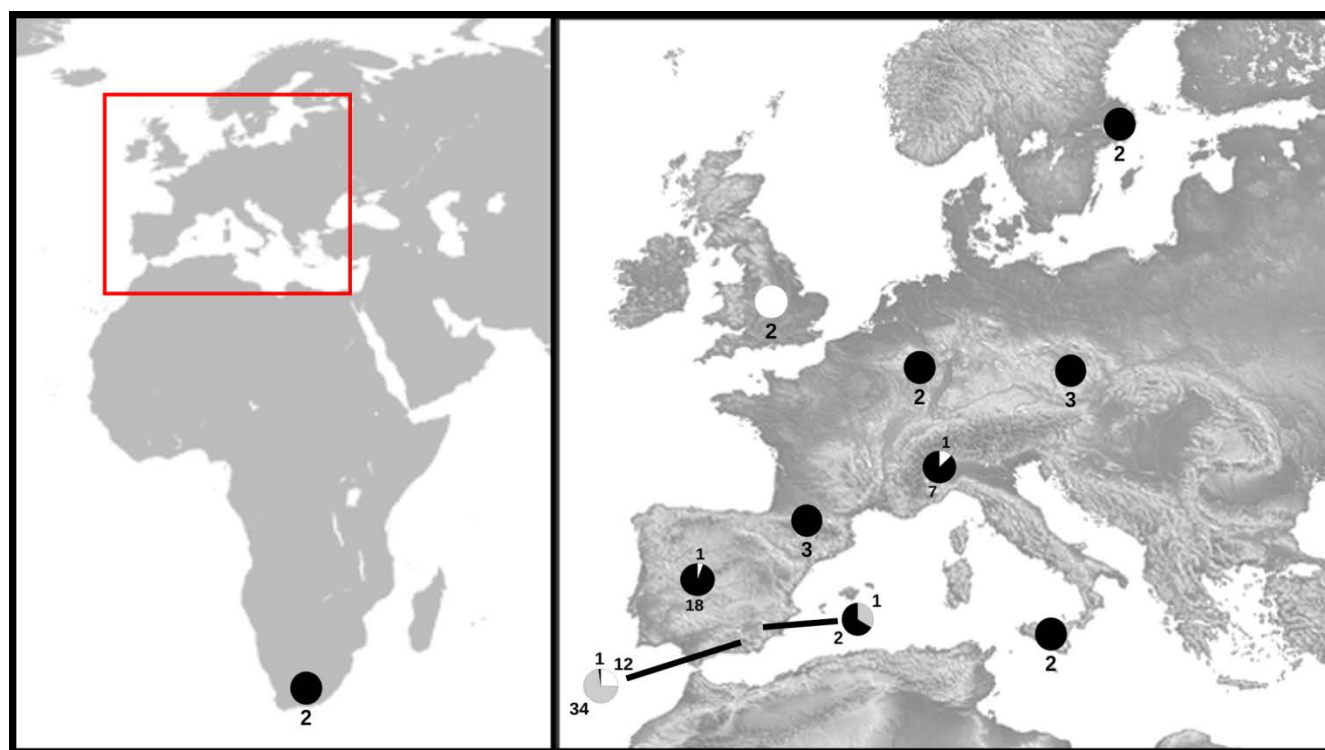

233

234 **Fig. 2.** Geographic location of *Ceratodon* samples included in this study. Pie charts indicate proportion of  
235 samples of each genomic group by areas (black: Ww genome group; grey: SN genome group; white:  
236 recombinant samples). The number of samples by groups in each area is given.

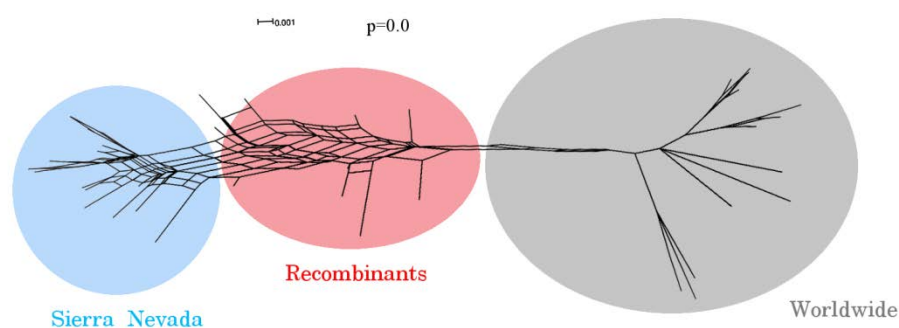

237

238 **Fig. 3.** Neighbor-Net network to test signals of reticulate evolution between the samples. The main groups are  
239 highlight by color circles with its names. The p value from the Phi test of recombination is indicated.

240

241 **Cloning DNA sequences**— Loci cloning confirmed that diploid specimens (see Flow cytometry analyses  
242 results) present two different copies of the same loci in most cases. The loci *TRc1b3.05*, *PPR* and *rpL23A*  
243 presented predominantly a single copy, although some individuals presented the two copies in other loci

244 (Appendix S6). Some haploid individuals presented two different copies of a locus. This may be due to the  
 245 possibility of gene redundancy, which can result from unequal crossing over, retroposition or chromosomal (or  
 246 genome) duplication (Magadum et al., 2013).

247 **Coalescent stochasticity analyses**— Although our data suggested the existence of recombinants between the two  
 248 groups, incomplete lineage sorting and hybridization may result in similar molecular signals. To test our  
 249 interpretation of the data we compared the distances of simulated trees under the hypothesis of coalescence  
 250 within the species tree with the differences between gene trees of all marker pairs. In all cases at least 95% of the  
 251 distances of the simulated trees were smaller than the differences between the original sequence trees (Table 2),  
 252 indicating that incomplete lineage sorting alone cannot explain the different tree topologies.

253

254 **Table 2.** Tree distances between original and simulated trees in pairwise comparisons. The upper triangular  
 255 matrix indicates the tree distance between the gene trees of molecular marker pairs. The lower triangular matrix  
 256 gives the distance values for simulated gene trees using the coalescent contained within the species tree in  
 257 comparison with the original gene tree. In parenthesis the percentage of the distances of the simulated trees with  
 258 smaller values than the distances of the two compared original gene trees is given. Values with 100% of smaller  
 259 distances are given in bold. These results indicate that incomplete lineage sorting alone cannot explain the  
 260 different tree topologies.

|                  | <i>trnL</i>             | <i>hp23.9</i>           | <i>TBP</i>         | <i>TRc1b3.05</i>   | <i>rpL23A</i>           | <i>PPR</i> |
|------------------|-------------------------|-------------------------|--------------------|--------------------|-------------------------|------------|
| <i>trnL</i>      | -                       | 142                     | 98                 | 92                 | 94                      | 102        |
| <i>hp23.9</i>    | <b>132-140</b><br>(100) | -                       | 124                | 110                | 106                     | 128        |
| <i>TBP</i>       | <b>88-96</b> (100)      | <b>116-122</b><br>(100) | -                  | 100                | 90                      | 48         |
| <i>TRc1b3.05</i> | <b>84-90</b> (100)      | <b>102-106</b><br>(100) | <b>90-96</b> (100) | -                  | 94                      | 100        |
| <i>rpL23A</i>    | <b>86-92</b> (100)      | 98-104 (95)             | 84-88 (95)         | <b>86-92</b> (100) | -                       | 106        |
| <i>PPR</i>       | 92-100 (99)             | <b>120-124</b><br>(100) | <b>38-46</b> (100) | <b>92-98</b> (100) | <b>100-104</b><br>(100) | -          |

261

262 **Flow cytometry analyses**— We obtained three clearly differentiated groups of cytotypes for both fresh and dry  
 263 material (Table 3, Fig. 4). Measurements from dry material gave higher values (by 18% on average) than those

264 from fresh material, for this reason a conversion factor ( $1/1.18 = 0.85$ ) was employed to the former. When fresh  
 265 and dry materials are considered together, the first cytotype had a mean value of  $1C = 0.37$  pg, and the second  
 266 one showed 25.4% more of DNA content ( $1C = 0.46$  pg). The third cytotype had  $1C = 0.82$  pg mean value of  
 267 DNA content. All of specimens of Ww group belonged to the smallest cytotype while those of the SN group  
 268 were categorized in the second cytotype, and the recombinant specimens were found in both the second and the  
 269 third cytotype (Appendix S6).

270

271 **Table 3.** Nuclear DNA content expressed in pg as measured by flow cytometry. Cytotypes considered, number  
 272 of samples used in the analyses (N), mean value of DNA, standard deviation and range of values obtained for  
 273 each cytotype are given (\* conversion factor of 0.85 is applied to dry material when fresh and dry material are  
 274 combined).

|                          | <b>Cytotype</b> | <b>N</b> | <b>Mean (pg)</b> | <b>Standard deviation</b> | <b>Min (pg)</b> | <b>Max (pg)</b> |
|--------------------------|-----------------|----------|------------------|---------------------------|-----------------|-----------------|
| Fresh material           | a               | 5        | 0.36             | <0.01                     | 0.36            | 0.37            |
|                          | b               | 20       | 0.46             | 0.01                      | 0.45            | 0.48            |
|                          | c               | 3        | 0.81             | 0.01                      | 0.81            | 0.82            |
| Dry material             | a*              | 25       | 0.44             | 0.01                      | 0.41            | 0.45            |
|                          | b*              | 21       | 0.54             | 0.01                      | 0.52            | 0.57            |
|                          | c*              | 1        | 0.97             | --                        | --              | --              |
| Fresh + dry material (*) | a+a*            | 30       | 0.37             | 0.01                      | 0.35            | 0.38            |
|                          | b+b*            | 41       | 0.46             | 0.01                      | 0.44            | 0.48            |
|                          | c+c*            | 4        | 0.82             | 0.01                      | 0.81            | 0.82            |
|                          |                 | 75       |                  |                           |                 |                 |

275

276

277

278

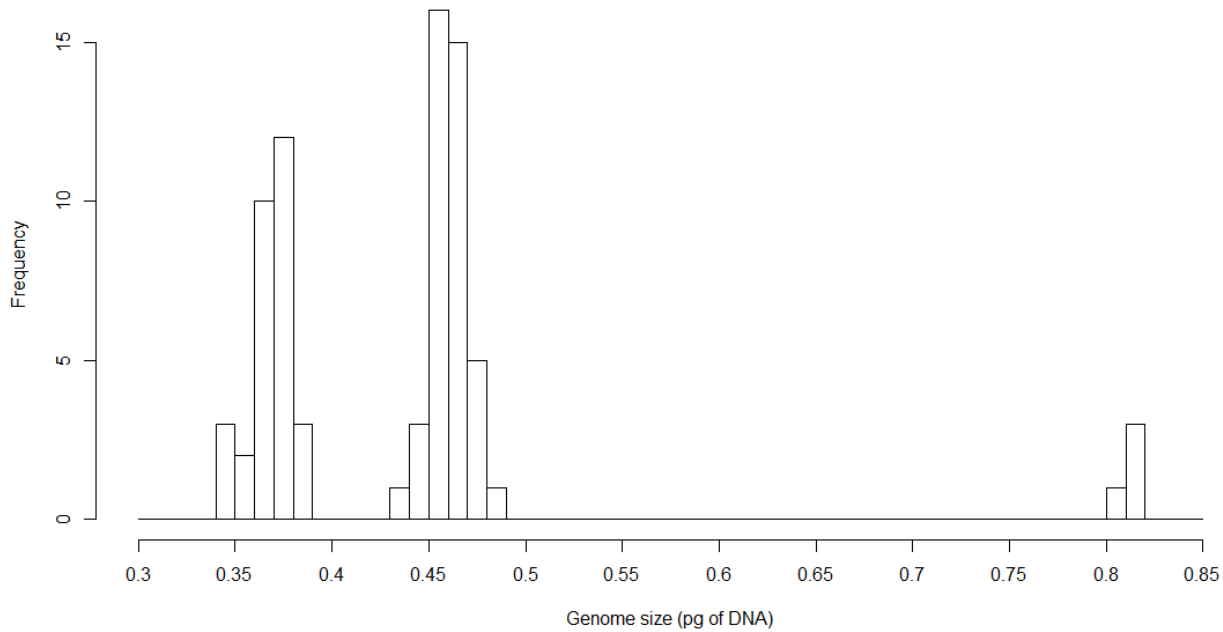

279

280 **Fig. 4.** Histogram of genome sizes of representative samples of *Ceratodon* generated by flow cytometry. A  
281 conversion factor of 0.85 was applied to the data obtained from dry material.

282

283 **Sex determination**— All of the samples from SN group (29) and all the recombinant samples (15) were females,  
284 while the Ww group (38) consisted mainly of females and only two males (one from Sierra Nevada Mountains  
285 and another one from the Alps), see Appendix 1. In the case of the Ww samples, the high proportion of female  
286 samples may be due to a strong bias, as moss cushions with the presence of sporophytes were preferentially  
287 taken, because in the field the distinction between *Ceratodon* and other genera, even belonging to different  
288 orders, is sometimes difficult. This situation is different in Sierra Nevada Mountains, because there we never  
289 observed sporophytes and samples were identified in the laboratory using a microscope. If we exclude a possible  
290 bias in the case of the Sierra Nevada Mountains samples, we can conclude based on the binominal distribution  
291 that with a probability  $> 95\%$  the proportion of males in the population is below 12% and males might even be  
292 completely absent.

293

294

295

## 296 **DISCUSSION**

297           In most major models of speciation, a period of allopatry is essential to evolve reproductive isolation  
298 (Coyne and Orr, 2004). However, in many cosmopolitan species, including many mosses and ferns, the entire  
299 habitable range of species is within the range of the dispersal distance of spores (Muñoz et al., 2004; Frahm,  
300 2007; Pisa et al., 2013) making strict allopatry unlikely. Therefore, it is reasonable to propose that speciation  
301 mechanisms that either occur in sympatry or accommodate some gene flow contribute to generating the extant  
302 diversity in such groups. The two best-studied sympatric speciation mechanisms in plants are polyploidy and the  
303 evolution of self-fertilization (Barringer, 2007). Here we show that the evolution of a new species, closely  
304 related to the cosmopolitan *Ceratodon purpureus*, was associated with a 25% increase in genome size and a  
305 significant decrease in frequency of males (Nieto-Lugilde et al., submitted), at least superficially similar to the  
306 evolution of parthenogenetic lineages in animals. Surprisingly, although we have found neither males nor  
307 evidence of recent sexual reproduction (i.e., sporophytes) in the new species, the genetic diversity among  
308 members of this species is relatively high. Despite the long period of isolation suggested by the sequence  
309 divergence between *C. purpureus* and the new species, we have found evidence of interspecific hybridization,  
310 suggesting that the new species apparently has retained the capacity for sexual reproduction. We discuss the  
311 taxonomic implications of this discovery in Nieto-Lugilde et al., submitted. Here we use genealogical and  
312 genome size data to make inferences regarding the genetic architecture of speciation, and the demographic  
313 parameters that permit such divergence.

314           Taxonomists have struggled with species delimitation in the genus *Ceratodon* since the description of  
315 the genus. Burley and Pritchard (1990) found references for nearly 50 specific or subspecific taxa within  
316 *Ceratodon*, but based on an extensive survey of herbarium specimens recognized only four species, *C.*  
317 *antarcticus* Cardot., *C. conicus* (Hampe) Lindb., *C. heterophyllus* Kindb., and *C. purpureus*, including three  
318 infraspecific taxa (subsp. *convolutus* (Reichardt) Burley, subsp. *purpureus*, and subsp. *stenocarpus* (Bruch &  
319 Schimp.) Dixon). Previous molecular population genetic analyses indicated that disjunct populations of *C.*  
320 *purpureus* were sometimes very closely related, clearly showing that long distance dispersal, even among

321 continents, was frequent enough to erase any signal of strong population structure (McDaniel and Shaw, 2005).  
322 However, these data did not provide strong genealogical support either for or against the existence of distinct  
323 species other than *C. purpureus*. Subsequent classical genetic analyses showed that geographically and  
324 ecologically distant populations were partially reproductively isolated from one another (McDaniel et al., 2007,  
325 2008), but these appeared to be somewhat porous reproductive barriers, and it was unclear that the populations  
326 represented different species.

327         McDaniel and Shaw (2005) did find some isolates of *C. purpureus* that were genetically distant from the  
328 more common haplotypes found in northern temperate regions. Here we found strong evidence that haplotypes  
329 which are distantly related to the typical *C. purpureus* haplotypes are locally abundant in the Sierra Nevada  
330 Mountains of southern Spain. We also found populations containing SN haplotypes and recombinants, together  
331 with some rare samples with the typical *C. purpureus* haplotypes. To evaluate the possibility that the segregation  
332 of these divergent haplotypes in the SN populations represents the retention of ancestral variation in the species  
333 (i.e., coalescent stochasticity causing incomplete lineage sorting) we generated coalescent simulations using  
334 BEAST and Mesquite. These simulations showed that the divergence between these two haplotypic classes was  
335 too great to be explained by coalescent stochasticity. The fact that this polymorphism is found in all of the  
336 nuclear loci that we sampled, and is geographically concentrated to the Sierra Nevada region, suggests that  
337 balancing selection is also an unlikely explanation. Collectively these data suggest that the SN haplotypes  
338 comprise a rare species sister to and partially reproductively isolated from the cosmopolitan *C. purpureus*.

339         The sympatric occurrence of typical *C. purpureus* haplotypes and SN haplotypes, even at modest  
340 frequencies, contradicts the suggestion by McDaniel and Shaw (2005) that the Mediterranean populations were  
341 genealogically isolated from the rest of the species as a result of decreased spore rain in peripheral populations  
342 separated by prevailing global wind patterns. If we assume that the current dispersal capabilities of *C. purpureus*  
343 represent the ancestral condition, this suggests that geography may not have been the primary isolating  
344 mechanism between the nascent species. It is certainly possible that an extrinsic factor, like a habitat preference,  
345 isolated the two species (Nieto-Lugilde et al., submitted). Remarkably, however, we detected only females in the  
346 SN species, implicating some intrinsic isolating mechanisms. Sex in dioecious bryophytes like *C. purpureus* is



347 determined at meiosis, by the segregation of a UV chromosome pair, meaning that ~50% of the spores produced  
348 in a population should be males. Some meiotic sex ratio variation has been observed in this species in natural  
349 populations (overall mean of proportion of males was 0.41 (0.17-- 0.72), Norrell et al., 2014) and artificial  
350 crosses (male-biased sex ratio = 60%, McDaniel et al., 2008). Even given our sample size (n = 29, with no  
351 males), we can conclude that the percentage of males in the SN populations is much lower (95% CI included 0% -  
352 - 12%; additional samples not included in this study lowers the 95% confidence interval to a range of 0% -  
353 6.7%). We do not know whether the decrease of males coincided with the speciation event, or occurred  
354 subsequent to the evolution of reproductive isolation. The evolution of apomixis or obligate selfing from  
355 historically outcrossing lineages is a well-documented route to the evolution of new species in plants (Stebbins,  
356 1974; Barrett, 2010; Wright et al., 2013), and parthenogenetic lineages associated with the loss of males are  
357 frequent in some animal lineages (Hagimori et al., 2006; Neaves and Baumann, 2011; Montelongo and Gómez-  
358 Zurita, 2015). However, we know of no other cases where the loss of males has been associated with speciation  
359 in bryophytes.

360         The presence of recombinants containing both typical *C. purpureus* alleles and alleles from the SN  
361 species indicated that rare interspecies hybridization has occurred between individuals of the two species. Most  
362 of the recombinants possessed the SN chloroplast type, based on the *trnL* sequence data, suggesting that this  
363 species was more often the maternal parent (consistent with the rarity of males). We found one instance of a  
364 recombinant plant that had a typical *C. purpureus trnL* sequence, but we cannot determine whether this was a  
365 rare case of a hybridization involving a SN male (i.e., a cross in the opposite direction) or whether this resulted  
366 from a backcross of a male recombinant to a typical *C. purpureus* female. Intrinsic genetic incompatibilities are  
367 often manifest as Dobzhansky-Muller interactions, which result in asymmetric introgression patterns at the  
368 causative loci (McDaniel et al., 2008) due to the death of incompatible multi-locus genotypes. Although we  
369 sampled only six loci across the genome, the recombinants did have a tendency to have the SN alleles at the *TBP*  
370 and *rpL23A* loci. We are currently examining the frequency of polymorphism across the genome of the SN and  
371 recombinant genotypes to distinguish among forms of extrinsic and intrinsic isolation between the SN and  
372 typical *C. purpureus* populations.

373           The flow cytometric data also showed that members of the SN species had a genome ~25% larger than  
374 typical members of *C. purpureus*. It is possible that the speciation involved a whole genome duplication event  
375 followed by rapid genome reduction, the duplication of a large chromosomes (Inoue et al., 2015; Panchy et al.,  
376 2016), or the accumulation of transposable elements (TEs), which contribute to the extraordinary variation in  
377 genome size within even closely related species in angiosperms (Vitte and Bennetzen, 2006). Although the  
378 current data represent the most comprehensive sampling of variation in genome size in *Ceratodon*, we still lack  
379 cytological data to determinate if variation in nuclear DNA content is due to an increase in the size of  
380 chromosomes or by the increase of number of chromosomes. The variance in genome size is almost equal  
381 between the two groups, suggesting that the SN species is fixed for whatever loci underlie the genome size  
382 change. Additionally, recombinants between the two groups have the genome size of SN species, not an  
383 intermediate value, suggesting that the increase in genome size may come from a single genomic change, rather  
384 than many small changes across genome. One hypothesis is that these plants have gained DNA on the sex  
385 chromosome which comprises nearly one-third of the genome (Heitz, 1932; Jachimsky, 1935; McDaniel et al.,  
386 2007). Sex chromosomes in other organisms are known to accumulate genomic material rapidly, sometimes in  
387 large translocations, and potentially generating pronounced evolutionary and ecological consequences (Tennessee  
388 et al., 2017). We are now attempting to generate artificial crosses to evaluate the genetic basis of the genome size  
389 difference.

390           We also found a third rare cytotype with a genome size approximately twice that of either SN plants or  
391 typical *C. purpureus* plants. These isolates all had mixed haplotypes (i.e., gene sequences from both the SN and  
392 typical *C. purpureus* clades) and a genome size very close to the sum of the SN group and Ww group (~1.2 %  
393 smaller than the sum of the group means), suggesting that they arose from an allopolyploid event. Without more  
394 sequence or cytological data we cannot formally eliminate the possibility that the larger cytotype arose from  
395 autopolyploidy followed by hybridization, although this would require the gain of ~10 % or loss (~12 %) of the  
396 genomic DNA. Additionally, allopolyploidy is a widely observed mechanism to restore the fertility of F1s  
397 hybrids between partially reproductively isolated species with karyotypic differences and exhibit meiotic

398 abnormalities (De Storme and Mason, 2014). The taxonomic consequences of this third cytotype are further  
399 discussed by Nieto-Lugilde et al. (submitted).

400 Finally, the new SN species apparently maintains levels of genetic diversity nearly equivalent to typical  
401 populations of its sister species *C. purpureus* without obviously undergoing sexual reproduction. Moss  
402 gametophytes can persist for many years, even in relatively stressful conditions, and easily spread clonally by  
403 gametophyte fragmentation. In some cases, such fragments may be dispersed a considerable distance (Frahm,  
404 2007, Lewis et al., 2014b). It is clear that spatially heterogeneous selection (Vrijenhoek, 1978) or frequency-  
405 dependent selection (Weeks and Hoffmann, 2008) can maintain high genetic diversity in clonal organisms.  
406 Antarctic populations of *C. purpureus*, which similarly lack any sexual reproduction, were also quite variable,  
407 although less polymorphic than was observed in the closely related nearby populations from Australia (Clarke et  
408 al., 2009). Also similar to the Antarctic studies, we found polymorphic nuclear ITS sequences between samples  
409 collected a few meters apart (unpublished data), indicating that these localities were colonized several times  
410 independently. However, unlike the Antarctic case, the SN isolates are genetically distinct from any known spore  
411 source. It is possible that sexual reproduction in the SN species generated the current variation under a past  
412 climate regime, or in undetected localities, although it is clearly far rarer than in *C. purpureus*. Further analyses  
413 of the evolutionary history of the SN population are likely to produce a better understanding of the phenomena  
414 that generate new species in cosmopolitan taxa.

415

## 416 **ACKNOWLEDGEMENTS**

417 The authors thank the curators of herbaria BOL, and S for providing plant material. To Laura Forrest from Royal  
418 Botanic Garden Edinburgh, United Kingdom, for donating samples. To the management group of the National  
419 Park of Sierra Nevada Natural Space for allowing us to collect samples in the National and Natural Parks. This  
420 study has been supported financially by the Spanish Ministry of Science and innovation (Projects CGL2011-  
421 22936/BOS and CGL2014-52579-R) and FEDER funds of the E.U., and an NSF grant (DEB 1541005) to SFM.  
422 M N.-L. also thanks the Spanish Ministry of Science and innovation, for being received a "Formación de  
423 Personal Investigador" fellowship (FPI program 2012) (reference BES-2012-056799).

424

425 LITERATURE CITED

- 426 Anderson, L. E. 1980. Cytology and reproductive biology of mosses. In R. J. Taylor and L. E. Levotin [eds.],  
427 The mosses of North America, 37–76. California Academy of Sciences, San Francisco, California, USA.
- 428 Barbé, M., N. J. Fenton, and Y. Bergeron. 2016. So close and yet so far away: long-distance dispersal events  
429 govern bryophyte metacommunity reassembly. *Journal of Ecology* 104: 1707–1719.
- 430 Barraclough, T. G., and A. P. Vogler. 2000. Detecting the Geographical Pattern of Speciation from Species-  
431 Level Phylogenies. *American Naturalist* 155: 419–434.
- 432 Barrett, S. C. H. 2010. Understanding plant reproductive diversity. *Philosophical Transactions of the Royal*  
433 *Society of London, B, Biological Sciences* 365: 99–109.
- 434 Barringer, B. C. 2007. Polyploidy and self-fertilization in flowering plants. *American Journal of Botany* 94:  
435 1527–1533.
- 436 Bryant, D., and V. Moulton. 2004. Neighbor-Net: An Agglomerative Method for the Construction of  
437 Phylogenetic Networks. *Molecular Biology and Evolution* 21: 255–265.
- 438 Bruen, T. C., H. Philippe, and D. Bryant. 2006. A Simple and Robust Statistical Test for Detecting the Presence  
439 of Recombination. *Genetics* 172: 2665–2681.
- 440 Burley, J. S., and N. M. Pritchard. 1990. Revision of the Genus *Ceratodon* (Bryophyta). *Harvard Papers in*  
441 *Botany* 1: 17–76.
- 442 Clarke, L. J., D. J. Ayre, and S.A. Robinson. 2009. Genetic structure of East Antarctic populations of the moss  
443 *Ceratodon purpureus*. *Antarctic Science* 21: 51–58.
- 444 Coyne, J. A., and H. A. Orr. 2004. Speciation. Sinauer Associates, Sunderland, Massachusetts, USA.
- 445 Crum, H. A. 1973. Mosses of the Great Lakes Forest. University of Michigan Herbarium, Ann Arbor, Michigan,  
446 USA.

- 447 De Storme, N. and A. Mason. 2014. Plant speciation through chromosome instability and ploidy change:  
448 Cellular mechanisms, molecular factors and evolutionary relevance. *Current Plant Biology* 1: 10–33.
- 449 Dev, S. B. 2015. Unsolved problems in biology—The state of current thinking. *Progress in Biophysics and*  
450 *Molecular Biology* 117: 232–239.
- 451 Doležel, J., P. Binárová, and S. Lucretti. 1989. Analysis of nuclear DNA content in plant cells by flow  
452 cytometry. *Biologia plantarum*. 31: 113–120.
- 453 Draper, I., L. Hedenäs, M. Stech, J. Patiño, O. Werner, J. M. González-Mancebo, M. Sim-Sim, et al. 2015. How  
454 many species of Isoetecium (Lembophyllaceae, Bryophyta) are there in Macaronesia? A survey using  
455 integrative taxonomy. *Botanical Journal of the Linnean Society* 177: 418–438.
- 456 Drummond, A. J., M. A. Suchard, D. Xie, and A. Rambaut. 2012. Bayesian phylogenetics with beauti and the  
457 beast 1.7. *Molecular Biology and Evolution* 29: 1969–73.
- 458 Felsenstein, J. 2005. PHYLIP (Phylogeny Inference Package) version 3.6. Distributed by the author. Department  
459 of Genome Sciences, University of Washington, Seattle.
- 460 Frahm, J. P. 2007. Diversity, dispersal and biogeography of bryophytes (mosses). In W. Foissner and D. L.  
461 Hawksworth [eds.], *Protist Diversity and Geographical Distribution*, vol.8, Topics in Biodiversity and  
462 Conservation, 43–50. Springer, Dordrecht, Netherlands.
- 463 Hagimori, T., Y. Abe, S. Date, and K. Miura. 2006. The First Finding of a Rickettsia Bacterium Associated with  
464 Parthenogenesis Induction Among Insects. *Current Microbiology* 52: 97–101.
- 465 Hall, T. 1999. BioEdit: a user-friendly biological sequence alignment editor and analysis program for Windows  
466 95/98/NT. *Nucleic Acids Symposium Series* 41: 95–98.
- 467 Heitz, E., 1932. Geschlechtschromosomen bei einem Laubmoss. *Berichte der Deutschen Botanischen*  
468 *Gesellschaft* 30: 204–206.

- 469 Huelsenbeck, J. P., B. Larget, and M. E. Alfaro. 2004. Bayesian phylogenetic model selection using reversible  
470 jump Markov chain Monte Carlo. *Molecular Biology and Evolution* 21: 1123–1133.
- 471 Huson, D. H., and D. Bryant. 2006. Application of phylogenetic networks in evolutionary studies. *Molecular*  
472 *Biology and Evolution* 23: 254–267.
- 473 Inoue, J., Y. Sato, R. Sinclair, K. Tsukamoto, and M. Nishida. 2015. Rapid genome reshaping by multiple-gene  
474 loss after whole-genome duplication in teleost fish suggested by mathematical modeling. *Proceedings of*  
475 *the National Academy of Sciences of the United States of America* 112: 14918–14923.
- 476 Jachimsky, H. 1935. Beitrag zur Kenntnis von Geschlechtschromosomen und Heterochromatin bei Moosen.  
477 *Jahrbücher für Wissenschaftliche Botanik* 81: 203–238.
- 478 Larkin, M. A., G. Blackshields, N. P. Brown, R. Chenna, P. A. McGettigan, H. McWilliam, F. Valentin, et al.  
479 2007. Clustal W and Clustal X version 2.0. *Bioinformatics* 23: 2947–2948.
- 480 Lenormand, T. 2002. Gene flow and the limits to natural selection. *Trends in Ecology & Evolution* 17: 183–189.
- 481 Lewis, L. R., R. Rozzi, and B. Goffinet. 2014a. Direct long-distance dispersal shapes a New World  
482 amphitropical disjunction in the dispersal-limited dung moss *Tetraplodon* (Bryopsida: Splachnaceae).  
483 *Journal of Biogeography* 41: 2385–2395.
- 484 Lewis, L. R., E. Behling, H. Gousse, E. Qian, C. S. Elphick, J.-F. Lamarre, J. Bêty, et al. 2014b. First evidence  
485 of bryophyte diaspores in the plumage of transequatorial migrant birds. *PeerJ* 2: e424.
- 486 Librado, P., and J. Rozas. 2009. DnaSP v5: a software for comprehensive analysis of DNA polymorphism data.  
487 *Bioinformatics* 25: 1451–1452.
- 488 Lipnerová I., P. Bureš, L. Horová, and P. Šmarda. 2012. Evolution of genome size in *Carex* (Cyperaceae) in  
489 relation to chromosome number and genomic base composition. *Annals of Botany* 111: 79–94.
- 490 Maddison, W. P. and D. R. Maddison. 2017. Mesquite: A modular system for evolutionary analysis. Version  
491 3.31. <http://mesquiteproject.org>. Accessed 25/09/2017.

- 492 Madlung, A. 2013. Polyploidy and its effect on evolutionary success: old questions revisited with new tools.  
493 *Heredity* 110: 99–104.
- 494 Magadum, S., U. Banerjee, P. Murugan, D. Gangapur, and R. Ravikesavan. 2013. Gene duplication as a major  
495 force in evolution. *Journal of Genetics* 92: 155–161.
- 496 Mallet, J. 2005. Hybridization as an invasion of the genome. *Trends in Ecology & Evolution* 20: 229–237.
- 497 Mao, X., G. Zhu, L. Zhang, S. Zhang, and S. J. Rossiter. 2014. Differential introgression among loci across a  
498 hybrid zone of the intermediate horseshoe bat (*Rhinolophus affinis*). *BMC Evolutionary Biology* 14: 154.
- 499 Maureira-Butler I. J., B. E. Pfeil, A. Muangprom, T. C. Osborn, and J. J. Doyle. 2008. The reticulate history of  
500 *Medicago* (Fabaceae). *Systematic Biology* 57: 466–482.
- 501 Mayr, E. 1963. Animal species and evolution. Harvard University Press, Cambridge, Massachusetts, USA.
- 502 McDaniel, S. F., and A. J. Shaw. 2005. Selective sweeps and intercontinental migration in the cosmopolitan  
503 moss *Ceratodon purpureus* (Hedw.) Brid. *Molecular Ecology* 14: 1121–1132.
- 504 McDaniel, S. F., J. H. Willis, and A. J. Shaw. 2007. A Linkage Map Reveals a Complex Basis for Segregation  
505 Distortion in an Interpopulation Cross in the Moss *Ceratodon purpureus*. *Genetics* 176: 2489–2500.
- 506 McDaniel, S. F., J. H. Willis, and A. J. Shaw. 2008. The genetic basis of developmental abnormalities in  
507 interpopulation hybrids of the moss *Ceratodon purpureus*. *Genetics* 179: 1425–1435.
- 508 McDaniel, S. F., M. von Stackelberg, S. Richardt, R. S. Quatrano, R. Reski, and S. A. Rensing. 2010. The  
509 speciation history of the *Physcomitrium*--*Physcomitrella* species complex. *Evolution* 64: 217–231.
- 510 McDaniel, S. F., M. J. van Baren, K. S. Jones, A. C. Payton, and R. S. Quatrano. 2013a. Estimating the  
511 Nucleotide Diversity in *Ceratodon purpureus* (Ditrichaceae) from 218 Conserved Exon-Primed, Intron-  
512 Spanning Nuclear Loci. *Applications in Plant Sciences* 1: 1200387.
- 513 McDaniel, S. F., K. M. Neubig, A. C. Payton, R. S. Quatrano, and D. J. Cove. 2013b. Recent gene-capture on  
514 the UV sex chromosomes of the moss *Ceratodon purpureus*. *Evolution* 67: 2811–2822.

- 515 McDaniel, S. F., P. F. Perroud, A. C. Cuming, and P. Szövényi. 2016. The *Ceratodon purpureus* Transcriptome  
516 Ushers in the Era of Moss Comparative Genomics. In S. A. Rensing, and P. F. Perroud [eds.], Genomes  
517 and Evolution of Charophytes, Bryophytes, Lycophytes and Ferns, 141--162. Elsevier Press, Oxford, UK.
- 518 Montelongo, T., and J. Gómez-Zurita. 2015. Nonrandom patterns of genetic admixture expose the complex  
519 historical hybrid origin of unisexual leaf beetle species in the Genus *Calligrapha*. *The American*  
520 *Naturalist* 185: 113–134.
- 521 Müller, K. 2005. SeqState: primer design and sequence statistics for phylogenetic DNA datasets. *Applied*  
522 *Bioinformatics* 4: 65–69.
- 523 Muñoz, J., Á. M. Felicísimo, F. Cabezas, A. R. Burgaz, and I. Martínez. 2004. Wind as a long-distance dispersal  
524 vehicle in the southern hemisphere. *Science* 304: 1144–1147.
- 525 Nadachowska-Brzyska, K., R. Burri, P. I. Olason, T. Kawakami, L. Smeds, and H. Ellegren. 2013. Demographic  
526 Divergence History of Pied Flycatcher and Collared Flycatcher Inferred from Whole-Genome Re-  
527 sequencing Data. *PLOS Genetics* 9: e1003942.
- 528 Neaves, W. B., and P. Baumann. 2011. Unisexual reproduction among vertebrates. *Trends in Genetics* 27: 81–  
529 88.
- 530 Norrell, T. E., K. S. Jones, A. C. Payton, and S. F. McDaniel. 2014. Meiotic sex ratio variation in natural  
531 populations of *Ceratodon purpureus* (Ditrichaceae). *American Journal of Botany* 101: 1572–1576.
- 532 Panchy, N., M. Lehti-Shiu, and S. H. Shiu. 2016. Evolution of gene duplication in plants. *Plant Physiology* 171:  
533 2294–2316.
- 534 Piñeiro, R., M. Popp, K. Hassel, D. Listl, K. B. Westergaard, K. I. Flatberg, H. K. Stenøien, and C. Brochmann.  
535 2012. Circumarctic dispersal and long-distance colonization of South America: the moss genus  
536 *Cinclidium*. *Journal of Biogeography* 39: 2041–2051.



- 537 Pisa, S., O. Werner, A. Vanderpoorten, M. Magdy, and R.M. Ros. 2013. Elevational patterns of genetic variation  
538 in the cosmopolitan moss *Bryum argenteum* (Bryaceae). *American Journal of Botany* 100: 2000–2008.
- 539 R Development Core Team (2017). R: A language and environment for statistical computing.
- 540 Rensing, S. A., A. K. Beike, and D. Lang. 2013. Evolutionary importance of generative polyploidy for genome  
541 evolution of haploid-dominant land plants. In J. Greilhuber, J. Dolezel, and J. F. Wendel [eds.], *Plant*  
542 *genome diversity*, vol. 2, 295–305. Springer, Vienna, Austria.
- 543 Ramsey, J., and D. W. Schemske. 1998. Pathways, mechanisms, and rates of polyploid formation in flowering  
544 plants. *Annual Review of Ecology and Systematics* 29: 467–501.
- 545 Rieseberg, L. H., and J. H. Willis. 2007. Plant Speciation. *Science* 317: 910–914.
- 546 Ronquist, F., M. Teslenko, P. van der Mark, D. L. Ayres, A. Darling, S. Höhna, B. Larget, et al. 2012. MrBayes  
547 3.2: efficient Bayesian phylogenetic inference and model choice across a large model space. *Systematic*  
548 *Biology* 61: 539–542.
- 549 Rosenberg, N. A. 2002. The probability of topological concordance of gene trees and species trees. *Theoretical*  
550 *Population Biology* 61: 225–247.
- 551 Seehausen, O., R. K. Butlin, I. Keller, C. E. Wagner, J. W. Boughman, P. A. Hohenlohe, C. L. Peichel, et al.  
552 2014. Genomics and the origin of species. *Nature Reviews Genetics* 15: 176–192.
- 553 Shaner, P. J. L., T. H. Tsao, R. C. Lin, W. Liang, C. F. Yeh, X. J. Yang, F. M. Lei, et al. 2015. Climate niche  
554 differentiation between two passerines despite ongoing gene flow. *Journal of Animal Ecology* 84: 829–  
555 839.
- 556 Shaw, A. J. 1994. Systematics of *Mielichhoferia* (Bryaceae: Musci). III. Hybridization between *M. elongata* and  
557 *M. mielichhoferiana*. *American Journal of Botany* 81: 782–790.

- 558 Shaw, A. J. 1998. Genetic analysis of a hybrid zone in *Mielichhoferia* (Musci). In J. W. Bates, N. W. Ashton,  
559 and J. G. Duckett [eds.], *Bryology for the twenty-first century*, 161–174. Maney Publishing and the  
560 British Bryological Society, Leeds, UK.
- 561 Shaw, A. J., O. Werner, and R. M. Ros. 2003. Intercontinental Mediterranean disjunct mosses: morphological  
562 and molecular patterns. *American Journal of Botany* 90: 540–550.
- 563 Simmons, M. P., and H. Ochoterena. 2000. Gaps as characters in sequence-based phylogenetic analyses.  
564 *Systematic Biology* 49: 369–381.
- 565 Stebbins, G. L. 1974. *Flowering plants: Evolution above the species level*. Belknap Press of Harvard University  
566 Press, Cambridge, Massachusetts, USA.
- 567 Stöver, B. C., and K. F. Müller. 2010. TreeGraph 2: combining and visualizing evidence from different  
568 phylogenetic analyses. *BMC Bioinformatics* 11: 7.
- 569 Szövényi, P., N. Devos, D. J. Weston, X. Yang, Z. Hock, J. A. Shaw, K. K. Shimizu, et al. 2014. Efficient  
570 Purging of Deleterious Mutations in Plants with Haploid Selfing. *Genome Biology and Evolution* 6: 1238–  
571 1252.
- 572 Tennessen, J. A., N. Wei, S. Straub, R. Govindarajulu, A. Liston, T. L. Ashman. 2017. Repeated translocation of  
573 a gene cassette drives sex chromosome turnover in strawberries. *bioRxiv* 163808.
- 574 Vitte, C., and J. L. Bennetzen. 2006. Analysis of retrotransposon structural diversity uncovers properties and  
575 propensities in angiosperm genome evolution. *Proceedings of the National Academy of Sciences, USA*  
576 103: 17638--17643.
- 577 Voglmayr, H. 2000. Nuclear DNA Amounts in Mosses (Musci). *Annals of Botany* 85: 531–546.
- 578 Vrijenhoek, R. C. 1978. Coexistence of clones in a heterogeneous environment. *Science* 199: 549--552.
- 579 Weeks, A. R., and A. A. Hoffmann. 2008. Frequency-dependent selection maintains clonal diversity in an  
580 asexual organism. *Proceedings of the National Academy of Sciences, USA* 105: 17872--17877.

- 581 Wright, S. 1931. Evolution in Mendelian populations. *Genetics* 16: 97--159.
- 582 Wright, S. I., S. Kalisz, and T. Slotte. 2013. Evolutionary consequences of self-fertilization in plants.  
583 *Proceedings of the Royal Society of London, B, Biological Sciences* 280: 20130133.
- 584 Yousefi, N., K. Hassel, K. I. Flatberg, P. Kemppainen, E. Trucchi, A. J. Shaw, M. O. Kyrkjeeide, et al. 2017.  
585 Divergent evolution and niche differentiation within the common peatmoss *Sphagnum magellanicum*.  
586 *American Journal of Botany* 104: 1060–1072.

587 **Appendix 1.** Voucher information for the studied specimens. For each sequenced sample the next information is  
588 given: herbarium code; geographical origin, gender if known (F for female, M for male), presence of sporophyte  
589 if appropriate, indicated by an asterisk (\*), GenBank accession numbers for the six loci studied, given in the next  
590 order: *hp23.9*, *PPR*, *rpL23A*, *TBP*, *TRc1b3.05* and *trnL*; sequences obtained by cloning are indicated by their  
591 GenBank accession number given in parentheses.

---

### Ingroup

#### *Mediterranean mountain areas*

**MUB 43730:** Spanish south-eastern mountains, F, KP825628, KP826017, KP826181, KP826402, KP826531, KY229001. **MUB 49304:** Sierra Nevada Mountains, F, KP825703, KP826091, KP826265, KP826473, KP826601, MG050779. **MUB 49306:** Sierra Nevada Mountains, F, KP825701, KP826089, KP826263, KP826471, KP826599, KY229023. **MUB 49318:** Sierra Nevada Mountains, KP825698, KP826086, KP826260, KP826468, KP826596, -. **MUB 49319:** Sierra Nevada Mountains, KP825697, KP826085, KP826259, KP826467, KP826595, MG050780. **MUB 49323:** Sierra Nevada Mountains, F, KP825696, KP826084, KP826258, KP826466, KP826594, KY229040. **MUB 49326:** Sierra Nevada Mountains, F, KP825693, KP826081, KP826255, KP826463, KP826591, MG050781. **MUB 49327:** Sierra Nevada Mountains, F, KP825692, KP826080, KP826254, KP826462, KP826590, -. **MUB 49329:** Sierra Nevada Mountains, F, KP825690, KP826078, KP826252, KP826460, KP826588, KY229024. **MUB 49331:** Sierra Nevada Mountains, F, KP825688, KP826076, KP826250, KP826459, KP826586, -. **MUB 49339:** Sierra Nevada Mountains, F, (MG050789, MG050790, MG050791, MG050792, MG050793, MG050794, MG050795, MG050796, MG050797, MG050798, MG050799), (KP826073, MG050748, MG050749, MG050750, MG050751, MG050752), KP826248, (KP826456, MG050761, MG050762, MG050763, MG050764, MG050765), KP826583, KY229035. **MUB 49341:** Sierra Nevada Mountains, F, KP825683, KP826071, KP826246, KP826454, KP826581, MG050782. **MUB 49342:** Sierra Nevada Mountains, F, KP825682, KP826070, KP826245, KP826453, KP826580, -. **MUB 49351:** Sierra Nevada Mountains, F, KP825681, KP826069, KP826244, KP826452, KP826579, -. **MUB 49353:** Sierra Nevada Mountains, F, KP825679, KP826067, KP826242, KP826450, -. **MUB 49356:** Sierra Nevada Mountains, KP825677, KP826065, KP826239, KP826448, KP826577, KY229030. **MUB 49357:** Sierra Nevada Mountains, F, KP825676, KP826064, KP826241, KP826447, KP826576, -. **MUB 49366:** Sierra Nevada Mountains, F, KP825670, KP826058, KP826238, KP826442, KP826570, KY229011. **MUB 49370:** Sierra Nevada Mountains, KP825674, KP826062, KP826234, KP826446, KP826574, KY229015. **MUB 49373:** Sierra Nevada Mountains, F, KP825671, KP826059, KP826233, KP826443, KP826571, -. **MUB 49382:** Sierra Nevada Mountains, F, KP825669, KP826057, KP826180, KP826441, KP826569, -. **MUB 49387:** Sierra Nevada Mountains, F, KP825666, KP826054, KP826230, KP826438, KP826565, -. **MUB 49399:** Sierra Nevada Mountains, F, KP825663, KP826051, KP826224, KP826435, KP826563, KY229033. **MUB 49403:** Sierra Nevada Mountains, F, KP825660, KP826048, KP826182, KP826432, KP826560, -. **MUB 49408:** Sierra Nevada Mountains, F, KP825657, KP826045, KP826222, -, KP826557, KY229005. **MUB 49410:** Sierra Nevada Mountains, F, KP825655, KP826043, KP826220, KP826428, KP826555, -. **MUB 49411:** Sierra Nevada Mountains, F, KP825654, KP826042, KP826219, KP826427, KP826554, MG050783. **MUB 49412:** Sierra Nevada Mountains, F, KP825653, KP826041, KP826218, KP826426, KP826553, -. **MUB 49413:** Sierra Nevada Mountains, F, KP825652, KP826040, KP826217, KP826425, KP826552, KY229008. **MUB 49424:** Sierra Nevada Mountains, F, KP825651, KP826039, KP826216, KP826424, KP826551, -. **MUB 49426:** Sierra Nevada Mountains, F, KP825649, KP826037, KP826214, KP826422, KP826549, -. **MUB 49427:** Sierra Nevada Mountains, F, KP825648, KP826036, KP826213, KP826421, KP826548, -. **MUB 49442:** Sierra Nevada Mountains, F, KP825643, KP826031, KP826208, KP826417, KP826544, -. **MUB 49443:** Sierra Nevada Mountains, F, KP825642, KP826030, KP826207, KP826416, KP826543, -. **MUB 49444:** Sierra Nevada Mountains, F, KP825641, KP826029, KP826206, KP826415, KP826542, MG050784. **MUB 49445:** Sierra Nevada Mountains, KP825640, KP826028, KP826209, KP826414, KP826541, -. **MUB 49451:** Sierra Nevada Mountains, F, (KP825639, MG050800, MG050801, MG050802, MG050803, MG050804, MG050805, MG050806, MG050807, MG050808), (KP826027, MG050753), (KP826204, MG050869, MG050870), KP826413, KP826540, KY229045. **MUB 49461:** Sierra Nevada Mountains, F, KP825638, KP826026, KP826203, KP826412, KP826539, KY229052. **MUB 49471:** Sierra Nevada Mountains, M, KP825706, KP826094, KP826201, KP826476, KP826604, KY229043. **MUB 49473:** Sierra Nevada Mountains, F,

---

---

(KP825637, MG050809, MG050810, MG050811, MG050812, MG050813, MG050814, MG050815, MG050816, MG050817, MG050818, MG050819), KP826025, (MG050871, MG050872, MG050873, MG050874, MG050875, MG050876), (MG050766, MG050767, MG050768, MG050769, MG050770), KP826538, KY229041. **MUB 49480:** Sierra Nevada Mountains, F, (KP825636, MG050820, MG050821, MG050822, MG050823, MG050824, MG050825, MG050826), KP826024, KP826199, KP826410, KP826537, KY229046. **MUB 49485:** Sierra Nevada Mountains, F, (KP825635, MG050827, MG050828, MG050829, MG050830, MG050831, MG050832, MG050833), (KP826023, MG050754, MG050755, MG050756, MG050757, MG050758), (MG050877, MG050878, MG050879, MG050880, MG050881, MG050882), (KP826409, MG050771, MG050772, MG050773, MG050774, MG050775, MG050776), KP826536, KY229032. **MUB 49492:** Sierra Nevada Mountains, F, (MG050834, MG050835, MG050836, MG050837, MG050838, MG050839, MG050840), KP826022, KP826198, KP826408, –, KY229037. **MUB 49501:** Sierra Nevada Mountains, F, KP825633, –, KP826197, KP826407, KP826535, KY229042. **MUB 49504:** Sierra Nevada Mountains, F, (KP825632, MG050841, MG050842, MG050843, MG050844, MG050845), KP826021, KP826196, KP826406, (MG050867, MG050868), KY229047. **MUB 49505:** Sierra Nevada Mountains, F, KP825631, KP826020, KP826195, KP826405, KP826534, KY229031. **MUB 49518:** Sierra Nevada Mountains, F, (KP825630, MG050846, MG050847, MG050848, MG050849, MG050850, MG050851, MG050852, MG050853, MG050854), (KP826019, MG050759), KP826194, KP826404, KP826533, KY229038. **MUB 49528:** Sierra Nevada Mountains, F, (KP825629, MG050855, MG050856, MG050857, MG050858, MG050859, MG050860), (KP826018, MG050760), KP826193, (MG050777, MG050778), KP826532, KY229027. **MUB 49538:** Spanish central mountain ranges, F, KP825762, KP826150, KP826192, KP826528, KP826659, KY229021. **MUB 49540:** Spanish central mountain ranges, F, KP825760, KP826148, KP826191, KP826526, KP826657, –, **MUB 49541:** Spanish central mountain ranges, F, KP825759, KP826147, KP826190, KP826525, KP826656, MG050785. **MUB 49542:** Spanish central mountain ranges, F, KP825758, KP826146, KP826188, KP826524, KP826655, –, **MUB 49545:** Spanish central mountain ranges, KP825755, KP826143, KP826186, KP826521, KP826652, KY229029. **MUB 49550:** Spanish central mountain ranges, F\*, KP825750, KP826138, KP826179, KP826516, KP826647, MG050786. **MUB 49552:** Spanish central mountain ranges, F\*, KP825748, KP826136, KP826177, KP826514, KP826645, MG050787. **MUB 49553:** Spanish central mountain ranges, F\*, KP825747, KP826135, KP826176, KP826513, KP826644, –, **MUB 49554:** Spanish central mountain ranges, F\*, KP825746, KP826134, KP826175, KP826512, KP826643, KY229017. **MUB 49555:** Spanish central mountain ranges, KP825745, KP826133, KP826174, KP826511, KP826642, –, **MUB 49557:** Spanish central mountain ranges, F, KP825743, KP826131, KP826173, KP826509, KP826640, MG050788. **MUB 49558:** Spanish central mountain ranges, F, KP825742, KP826130, KP826172, KP826508, KP826639, –, **MUB 49560:** Spanish central mountain ranges, F\*, KP825740, KP826128, KP826170, KP826506, KP826637, KY229013. **MUB 49562:** Spanish central mountain ranges, KP825738, KP826126, –, KP826504, KP826635, –, **MUB 49564:** Spanish central mountain ranges, F\*, KP825736, KP826124, KP826168, KP826502, KP826633, –, **MUB 49566:** Spanish central mountain ranges, F, KP825734, KP826122, KP826167, KP826500, KP826631, KY229044. **MUB 49567:** Spanish central mountain ranges, F\*, KP825733, KP826121, KP826166, KP826499, KP826630, KY229003. **MUB 49568:** Spanish central mountain ranges, F, KP825732, –, KP826165, –, KP826629, KY229048. **MUB 49569:** Spanish central mountain ranges, F\*, KP825731, KP826119, KP826164, KP826497, KP826628, KY229009. **MUB 49570:** Sicilian Mount Etna, F, KP825714, KP826107, –, KP826478, KP826606, KY229016. **MUB 49593:** Sicilian Mount Etna, F, KP825715, KP826106, KP826163, KP826479, KP826607, KY229034. **MUB 49600:** Spanish south-eastern mountains, F\*, KP825722, KP826104, KP826159, KP826486, KP826613, KY229022. **MUB 49602:** Spanish south-eastern mountains, F, KP825723, KP826105, KP826160, KP826487, KP826614, KY229050.

#### *Other mountainous systems*

**CBFS 6159:** Alps, KP825712, KP826100, –, KX503294, –, –, **CBFS 6162:** Alps, F, KP825711, KP826099, KP826154, KP826483, KP826611, KY229028. **CBFS 13557:** Alps, F, KP825708, KP826096, KP826151, –, KP826608. **MUB 49604:** Alps, F\*, KP825627, KP826016, KP826162, KP826401, KP826530, KY229053. **MUB 49606:** Alps, F\*, KP825727, KP826115, KP826161, KP826493, KP826624, –, **MUB 49613:** Alps, F\*, KP825726, KP826114, –, KP826492, KP826623, KY229051. **MUB 49617:** Alps, F\*, KP825725, KP826113, –, KP826491, KP826622, KY229002. **MUB 49619:** Alps, M, KP825724, KP826112, –, KP826490, KP826621, KY229000. **MUB 49624:** Pyrenees, F\*, KP825730, KP826118, –, KP826496, KP826627, KY229007. **MUB 49629:** Pyrenees, F\*, KP825729, KP826117, KP826158, KP826495, KP826626, KY229055. **MUB 49650:** Pyrenees, F\*, KP825728, KP826116, KP826157, KP826494, KP826625, KY229004.

---

---

**Lowlands**

**BOL 46302:** South Africa, F\*, KP825717, KP826109, –, KX503295, KP826618, KY229010. **BOL 46303:** South Africa, F\*, KP825716, KP826108, –, –, KP826617, --. **MUB 49652:** Germany, F\*, KP825718, KP826110, KP826156, KP826488, KP826619, KY229039. **MUB 49653:** Germany, F\*, KP825719, KP826111, –, KP826489, KP826620, KY229020. **MUB 49654:** Czech Republic, F\*, KX503276, –, KX503286, KX503291, KX503306, KY229012. **MUB 49655:** Czech Republic, F\*, KX503275, –, KX503288, KX503290, KX503305, KY228999. **MUB 49659:** Czech Republic, F\*, KX503274, –, KX503287, KX503289, KX503304, KY229006. **MUB 52185:** United Kingdom, KX503277, KX503282, KX503284, KX503292, KX503307, KY229049. **MUB 52186:** United Kingdom, (MG050861, MG050862, MG050863, MG050864, MG050865, MG050866), KX503283, KX503285, KX503293, KX503308, KY229054. **S B201182:** Sweden, F\*, KP825721, KP826103, –, KX503296, KP826616, KY229018. **S B201183:** Sweden, F\*, KP825720, KP826102, –, KP826485, KP826615, KY229014.

**Outgroup: *Cheilothela chloropus***

**MUB52416:** Sierra Nevada Mountains, KX503273, KX503281, –, KX503299, KX503303, KY229025. **MUB52417:** Sierra Nevada Mountains, –, KX503280, –, KX503298, KX503302, –. **MUB52418:** Sierra Nevada Mountains, –, KX503279, –, KX503297, KX503301, KY229026. **MUB52419:** Sierra Nevada Mountains, –, KX503278, –, –, KX503300, –.

---

592

593 **Online Supplementary Materials**

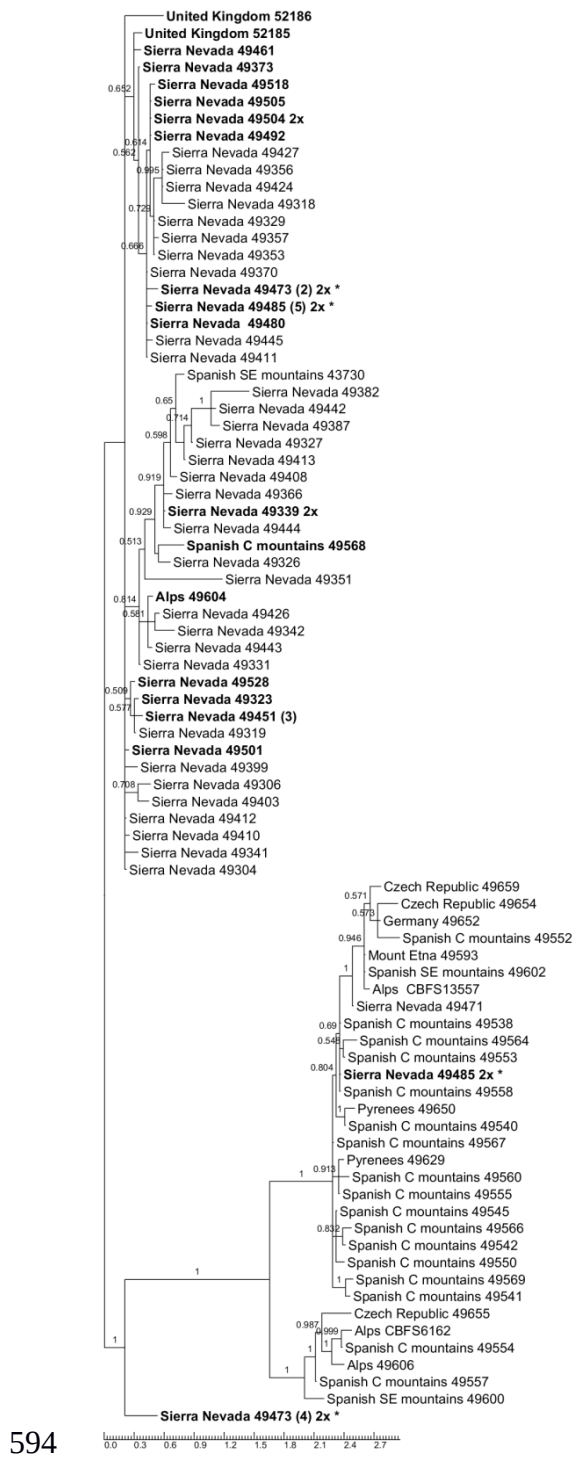

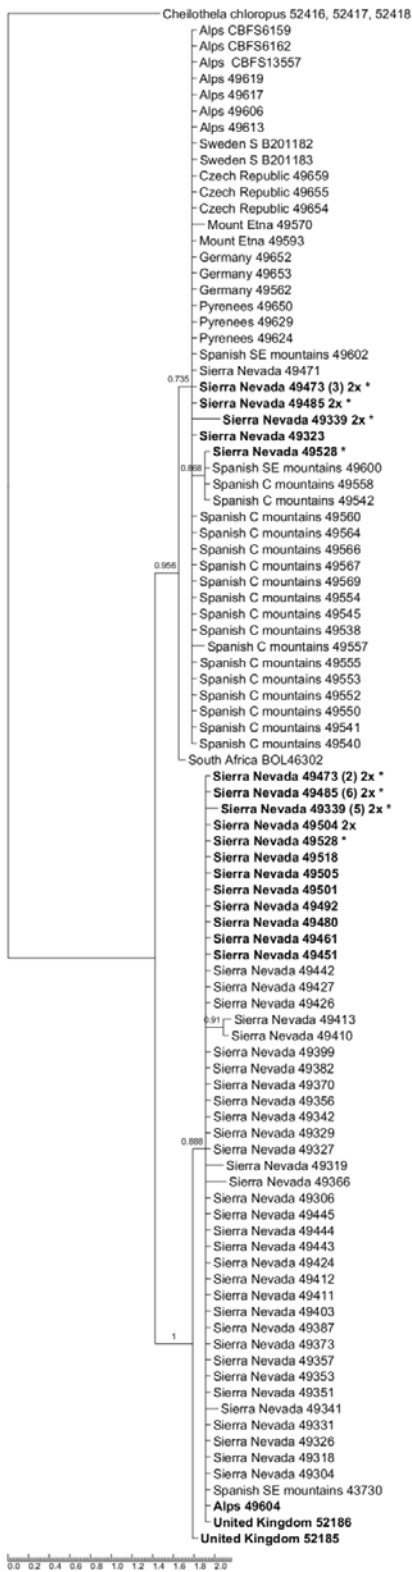

600

601 **Appendix S2.** Phylogenetic tree inferred from the nuclear *TBP* locus. Information about the data given for each

602 tip in the tree as in Appendix S1.

603



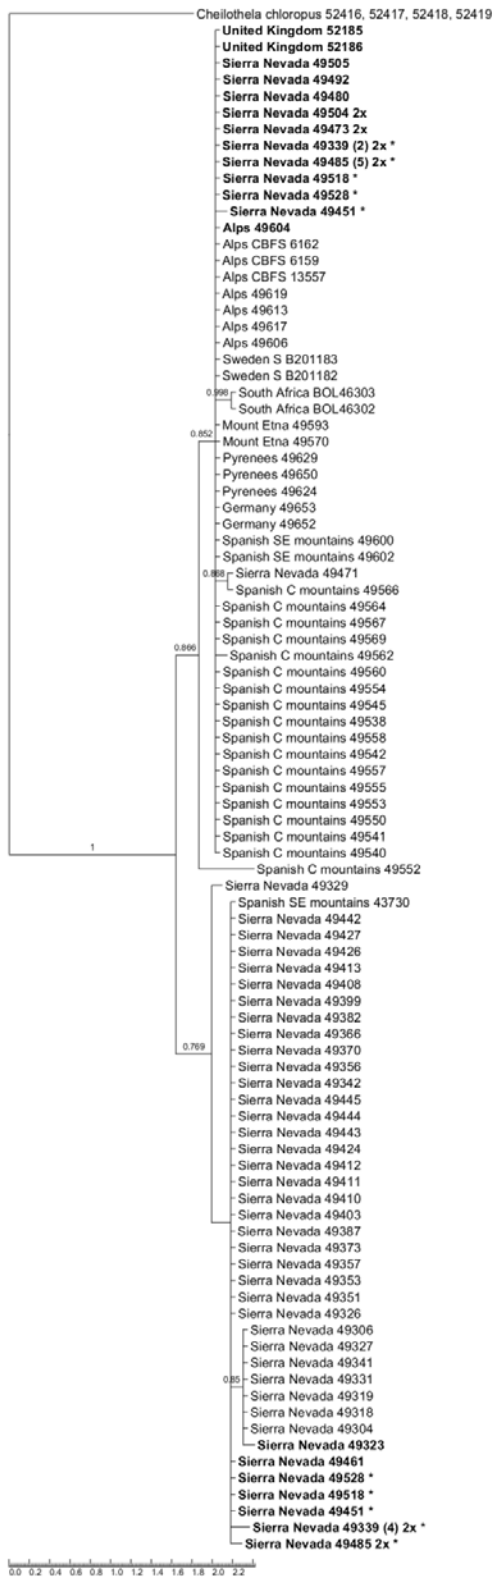

604

605 **Appendix S3.** Phylogenetic tree inferred from the nuclear *PPR* locus. Information about the data given for each  
606 tip in the tree as in Appendix S1.

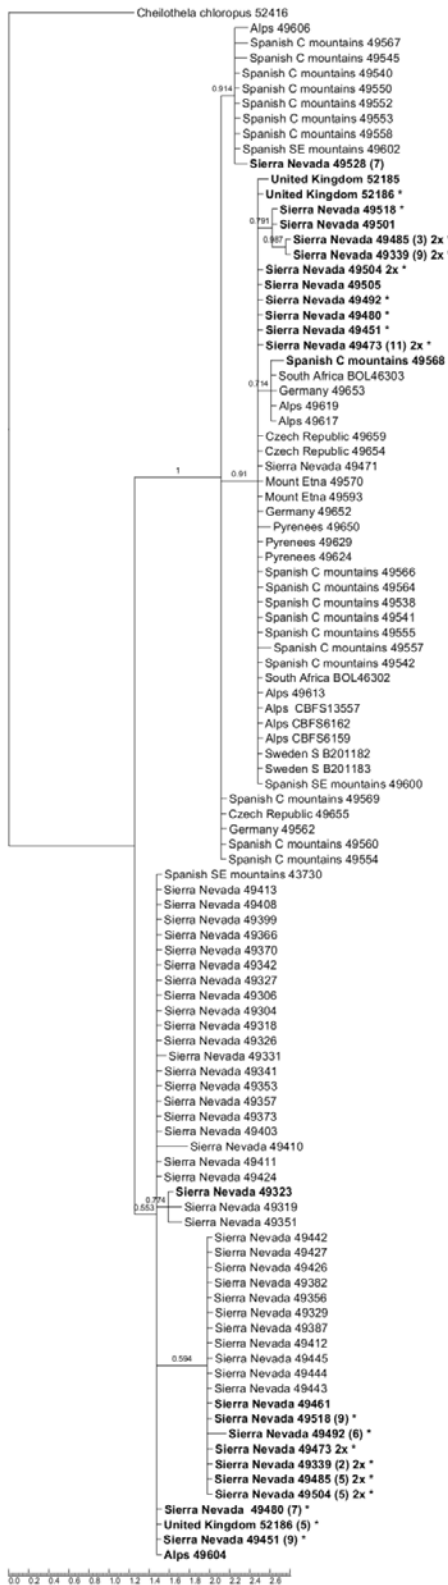

607

608 **Appendix S4.** Phylogenetic tree inferred from the nuclear *hp23.9* locus. Information about the data given for  
609 each tip in the tree as in Appendix S1.

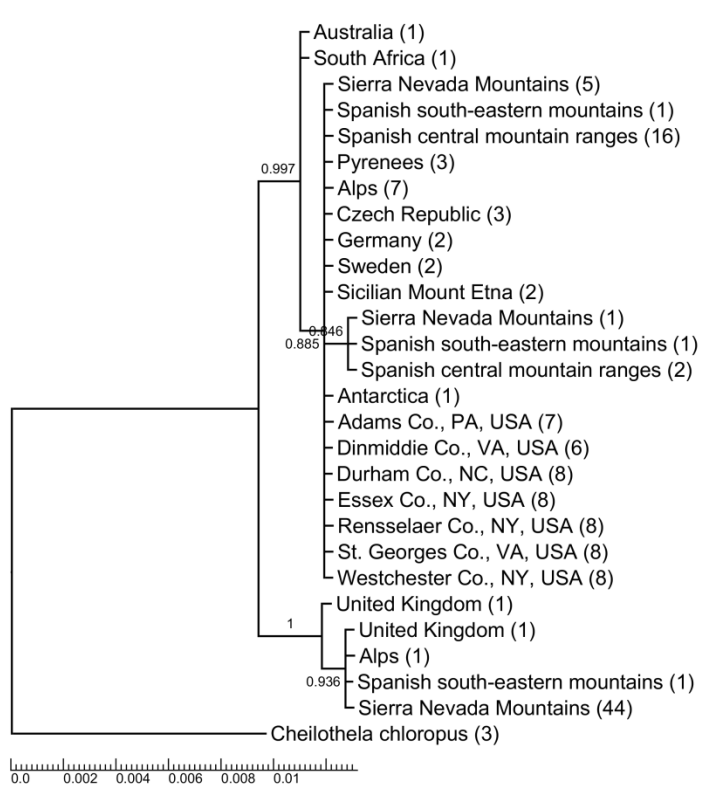

610

611 **Appendix S5.** Phylogenetic tree inferred from the nuclear *TBP* locus adding to the samples used in this work  
 612 other *Ceratodon* samples from Antarctica, Australia, and North America (GenBank accession numbers:  
 613 KC436690 to KC436698, KC436701 to KC436706 and KC436710 to KC436750); number of similar sequences  
 614 by area is indicated between parentheses.

615

616 **Appendix S6.** List of samples employed, indicating for each DNA locus analyzed, to which clade obtained in  
 617 the phylogenetic analysis they belong (blue: SN clade, grey: Ww clade), the state of material used in cytometry  
 618 analysis, and the amount of DNA (in case of dry material corrected by a factor of 0.85).

| Specimen   | <i>hp23.9</i> | <i>PPR</i> | <i>rpL23A</i> | <i>TBP</i> | <i>TRc1b3.05</i> | <i>TrnL</i> | State of material used | Amount of DNA (pg) |
|------------|---------------|------------|---------------|------------|------------------|-------------|------------------------|--------------------|
| BOL 46302  | Ww            | Ww         |               | Ww         | Ww               | Ww          |                        | --                 |
| BOL 46303  | Ww            | Ww         |               |            | Ww               |             |                        | --                 |
| CBFS 13557 | Ww            | Ww         | Ww            |            | Ww               |             | dry                    | 0,36               |
| CBFS 6159  | Ww            | Ww         |               | Ww         |                  |             |                        | --                 |
| CBFS 6162  | Ww            | Ww         | Ww            | Ww         | Ww               | Ww          |                        | --                 |
| MUB 43730  | SN            | SN         | SN            | SN         | SN               | SN          | dry                    | 0,44               |
| MUB 49304  | SN            | SN         | SN            | SN         | SN               | SN          | dry                    | 0,47               |
| MUB 49306  | SN            | SN         | SN            | SN         | SN               | SN          |                        | --                 |
| MUB 49318  | SN            | SN         | SN            | SN         | SN               |             | fresh                  | 0,47               |
| MUB 49319  | SN            | SN         | SN            | SN         | SN               | SN          | fresh                  | 0,45               |
| MUB 49323  | SN            | SN         | SN            | Ww         | SN               | SN          | fresh                  | 0,46               |
| MUB 49326  | SN            | SN         | SN            | SN         | SN               | SN          | dry                    | 0,46               |

|           |       |       |       |       |    |    |  |            |
|-----------|-------|-------|-------|-------|----|----|--|------------|
| MUB 49327 | SN    | SN    | SN    | SN    | SN |    |  | --         |
| MUB 49329 | SN    | SN    | SN    | SN    | SN | SN |  | dry 0,45   |
| MUB 49331 | SN    | SN    | SN    | SN    | SN |    |  | fresh 0,46 |
| MUB 49339 | Ww/SN | Ww/SN | SN    | Ww/SN | Ww | SN |  | fresh 0,82 |
| MUB 49341 | SN    | SN    | SN    | SN    | SN | SN |  | fresh 0,45 |
| MUB 49342 | SN    | SN    | SN    | SN    | SN |    |  | fresh 0,46 |
| MUB 49351 | SN    | SN    | SN    | SN    | SN |    |  | fresh 0,47 |
| MUB 49353 | SN    | SN    | SN    | SN    |    |    |  | dry 0,45   |
| MUB 49356 | SN    | SN    | SN    | SN    | SN | SN |  | fresh 0,47 |
| MUB 49357 | SN    | SN    | SN    | SN    | SN |    |  | dry 0,48   |
| MUB 49366 | SN    | SN    | SN    | SN    | SN | SN |  | fresh 0,46 |
| MUB 49370 | SN    | SN    | SN    | SN    | SN | SN |  | dry 0,46   |
| MUB 49373 | SN    | SN    | SN    | SN    | SN |    |  | dry 0,47   |
| MUB 49382 | SN    | SN    | SN    | SN    | SN |    |  | dry 0,48   |
| MUB 49387 | SN    | SN    | SN    | SN    | SN |    |  | dry 0,47   |
| MUB 49399 | SN    | SN    | SN    | SN    | SN | SN |  | fresh 0,47 |
| MUB 49403 | SN    | SN    | SN    | SN    | SN |    |  | fresh 0,47 |
| MUB 49408 | SN    | SN    | SN    |       | SN | SN |  | dry 0,45   |
| MUB 49410 | SN    | SN    | SN    | SN    | SN |    |  | dry 0,45   |
| MUB 49411 | SN    | SN    | SN    | SN    | SN | SN |  | fresh 0,47 |
| MUB 49412 | SN    | SN    | SN    | SN    | SN |    |  | dry 0,48   |
| MUB 49413 | SN    | SN    | SN    | SN    | SN | SN |  | dry 0,45   |
| MUB 49424 | SN    | SN    | SN    | SN    | SN |    |  | dry 0,46   |
| MUB 49426 | SN    | SN    | SN    | SN    | SN |    |  | dry 0,44   |
| MUB 49427 | SN    | SN    | SN    | SN    | SN |    |  | fresh 0,46 |
| MUB 49442 | SN    | SN    | SN    | SN    | SN |    |  | dry 0,45   |
| MUB 49443 | SN    | SN    | SN    | SN    | SN |    |  | dry 0,46   |
| MUB 49444 | SN    | SN    | SN    | SN    | SN | SN |  | fresh 0,47 |
| MUB 49445 | SN    | SN    | SN    | SN    | SN |    |  | dry 0,47   |
| MUB 49451 | Ww/SN | Ww/SN | SN    | SN    | Ww | SN |  | fresh 0,46 |
| MUB 49461 | SN    | SN    | SN    | SN    | Ww | SN |  | dry 0,47   |
| MUB 49471 | Ww    | Ww    | Ww    | Ww    | Ww | Ww |  | fresh 0,37 |
| MUB 49473 | Ww/SN | Ww    | Ww/SN | Ww/SN | Ww | SN |  | fresh 0,81 |
| MUB 49480 | Ww/SN | Ww    | SN    | SN    | Ww | SN |  | dry 0,47   |
| MUB 49485 | Ww/SN | Ww/SN | Ww/SN | Ww/SN | Ww | SN |  | dry 0,82   |
| MUB 49492 | Ww/SN | Ww    | SN    | SN    | Ww | SN |  | fresh 0,46 |
| MUB 49501 | Ww    |       | SN    | SN    | SN | SN |  | --         |
| MUB 49504 | Ww/SN | Ww    | SN    | SN    | SN | SN |  | fresh 0,82 |
| MUB 49505 | Ww    | Ww    | SN    | SN    | Ww | SN |  | --         |
| MUB 49518 | Ww/SN | Ww/SN | SN    | SN    | Ww | SN |  | fresh 0,45 |
| MUB 49528 | Ww    | Ww/SN | SN    | Ww/SN | Ww | Ww |  | fresh 0,46 |
| MUB 49538 | Ww    | Ww    | Ww    | Ww    | Ww | Ww |  | dry 0,35   |
| MUB 49540 | Ww    | Ww    | Ww    | Ww    | Ww |    |  | dry 0,37   |
| MUB 49541 | Ww    | Ww    | Ww    | Ww    | Ww | Ww |  | dry 0,37   |
| MUB 49542 | Ww    | Ww    | Ww    | Ww    | Ww |    |  | --         |
| MUB 49545 | Ww    | Ww    | Ww    | Ww    | Ww | Ww |  | dry 0,35   |
| MUB 49550 | Ww    | Ww    | Ww    | Ww    | Ww | Ww |  | fresh 0,36 |
| MUB 49552 | Ww    | Ww    | Ww    | Ww    | Ww | Ww |  | fresh 0,36 |
| MUB 49553 | Ww    | Ww    | Ww    | Ww    | Ww |    |  | dry 0,38   |
| MUB 49554 | Ww    | Ww    | Ww    | Ww    | Ww | Ww |  | dry 0,35   |

|           |       |    |    |    |    |    |       |      |
|-----------|-------|----|----|----|----|----|-------|------|
| MUB 49555 | Ww    | Ww | Ww | Ww | Ww |    | dry   | 0,37 |
| MUB 49557 | Ww    | Ww | Ww | Ww | Ww | Ww | dry   | 0,37 |
| MUB 49558 | Ww    | Ww | Ww | Ww | Ww |    | dry   | 0,38 |
| MUB 49560 | Ww    | Ww | Ww | Ww | Ww | Ww | dry   | 0,36 |
| MUB 49562 | Ww    | Ww |    | Ww | Ww |    | dry   | 0,36 |
| MUB 49564 | Ww    | Ww | Ww | Ww | Ww |    | dry   | 0,37 |
| MUB 49566 | Ww    | Ww | Ww | Ww | Ww | Ww | dry   | 0,36 |
| MUB 49567 | Ww    | Ww | Ww | Ww | Ww | Ww |       | --   |
| MUB 49568 | Ww    |    | SN |    | Ww | SN |       | --   |
| MUB 49569 | Ww    | Ww | Ww | Ww | Ww | Ww |       | --   |
| MUB 49570 | Ww    | Ww |    | Ww | Ww | Ww | fresh | 0,37 |
| MUB 49593 | Ww    | Ww | Ww | Ww | Ww | Ww | fresh | 0,36 |
| MUB 49600 | Ww    | Ww | Ww | Ww | Ww | Ww |       | --   |
| MUB 49602 | Ww    | Ww | Ww | Ww | Ww | Ww |       | --   |
| MUB 49604 | SN    | Ww | SN | SN | Ww | SN | fresh | 0,48 |
| MUB 49606 | Ww    | Ww | Ww | Ww | Ww |    | dry   | 0,37 |
| MUB 49613 | Ww    | Ww |    | Ww | Ww | Ww | dry   | 0,38 |
| MUB 49617 | Ww    | Ww |    | Ww | Ww | Ww | dry   | 0,38 |
| MUB 49619 | Ww    | Ww |    | Ww | Ww | Ww | dry   | 0,37 |
| MUB 49624 | Ww    | Ww |    | Ww | Ww | Ww | dry   | 0,37 |
| MUB 49629 | Ww    | Ww | Ww | Ww | Ww | Ww |       | --   |
| MUB 49650 | Ww    | Ww | Ww | Ww | Ww | Ww | dry   | 0,38 |
| MUB 49652 | Ww    | Ww | Ww | Ww | Ww | Ww | dry   | 0,37 |
| MUB 49653 | Ww    | Ww |    | Ww | Ww | Ww | dry   | 0,37 |
| MUB 49654 | Ww    |    | Ww | Ww | Ww | Ww | dry   | 0,37 |
| MUB 49655 | Ww    |    | Ww | Ww | Ww | Ww | dry   | 0,38 |
| MUB 49659 | Ww    |    | Ww | Ww | Ww | Ww | dry   | 0,38 |
| MUB 52185 | Ww    | Ww | SN | SN | SN | SN |       | --   |
| MUB 52186 | Ww/SN | Ww | SN | SN | SN | SN | fresh | 0,47 |
| S B201182 | Ww    | Ww |    | Ww | Ww | Ww |       | --   |
| S B201183 | Ww    | Ww |    | Ww | Ww | Ww |       | --   |
